# Supplementary figures and images for: The first total synthesis of potent antitumoral (±)-mafaicheenamine A, unnatural 6-fluoromafaicheenamine A and expedient synthesis of clausine E
Source: Royal Society of Chemistry journal article supplement (doi:10.1039/c6ra03242g), 2016-01-01

YA\_202\_81\_A\_DMSO\_1H

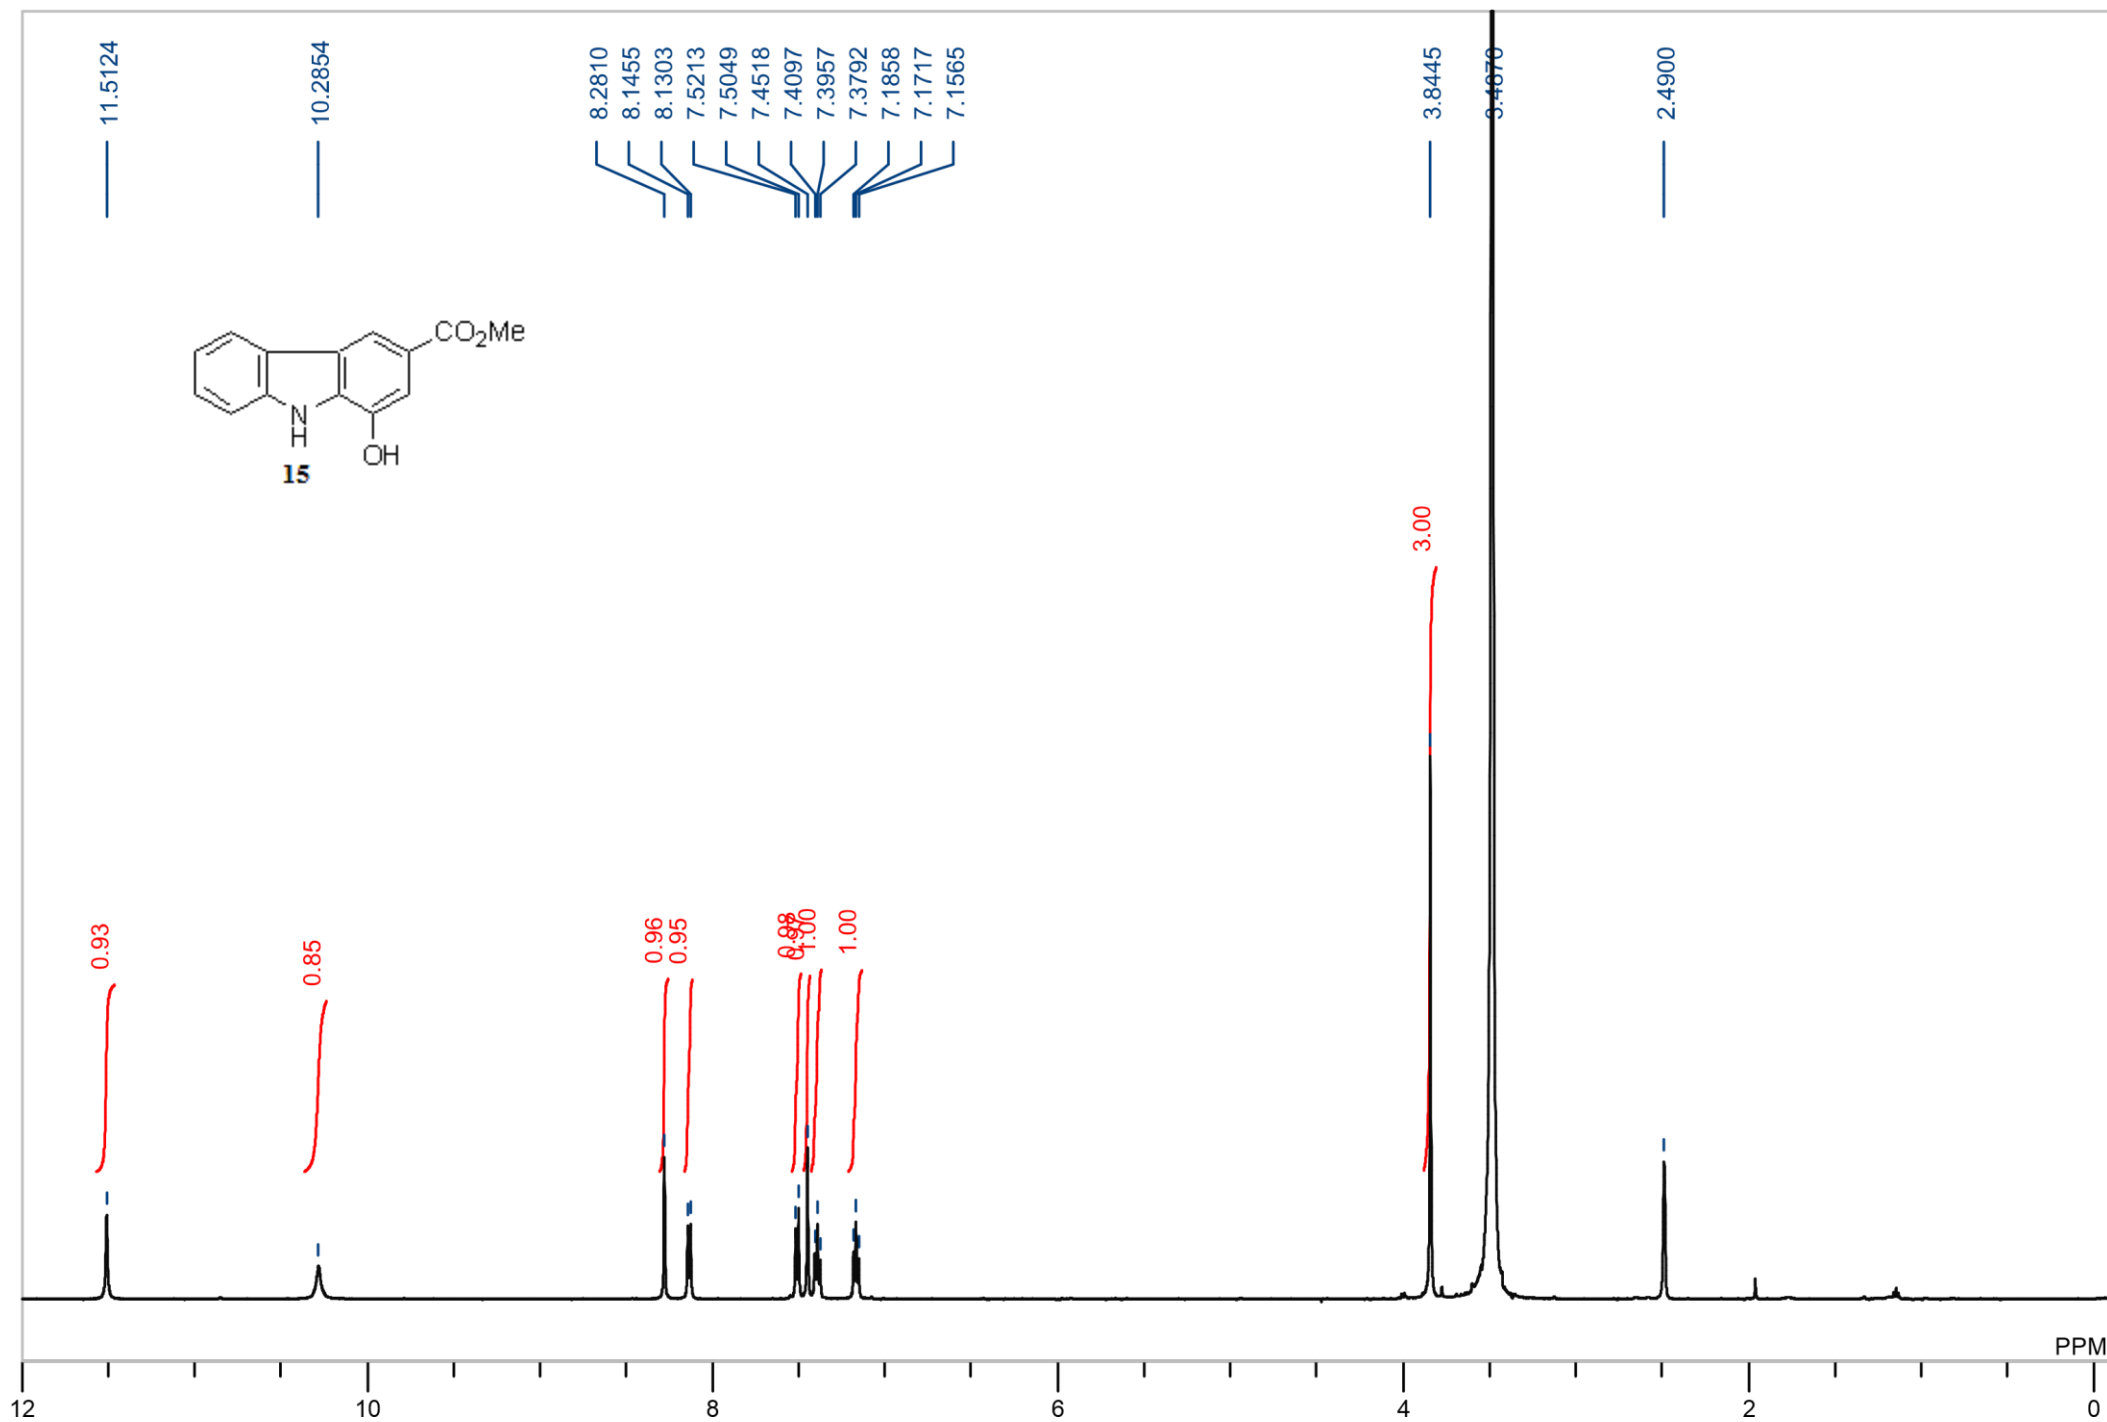

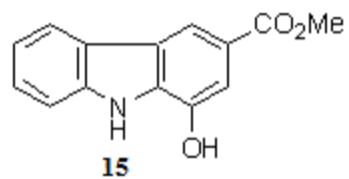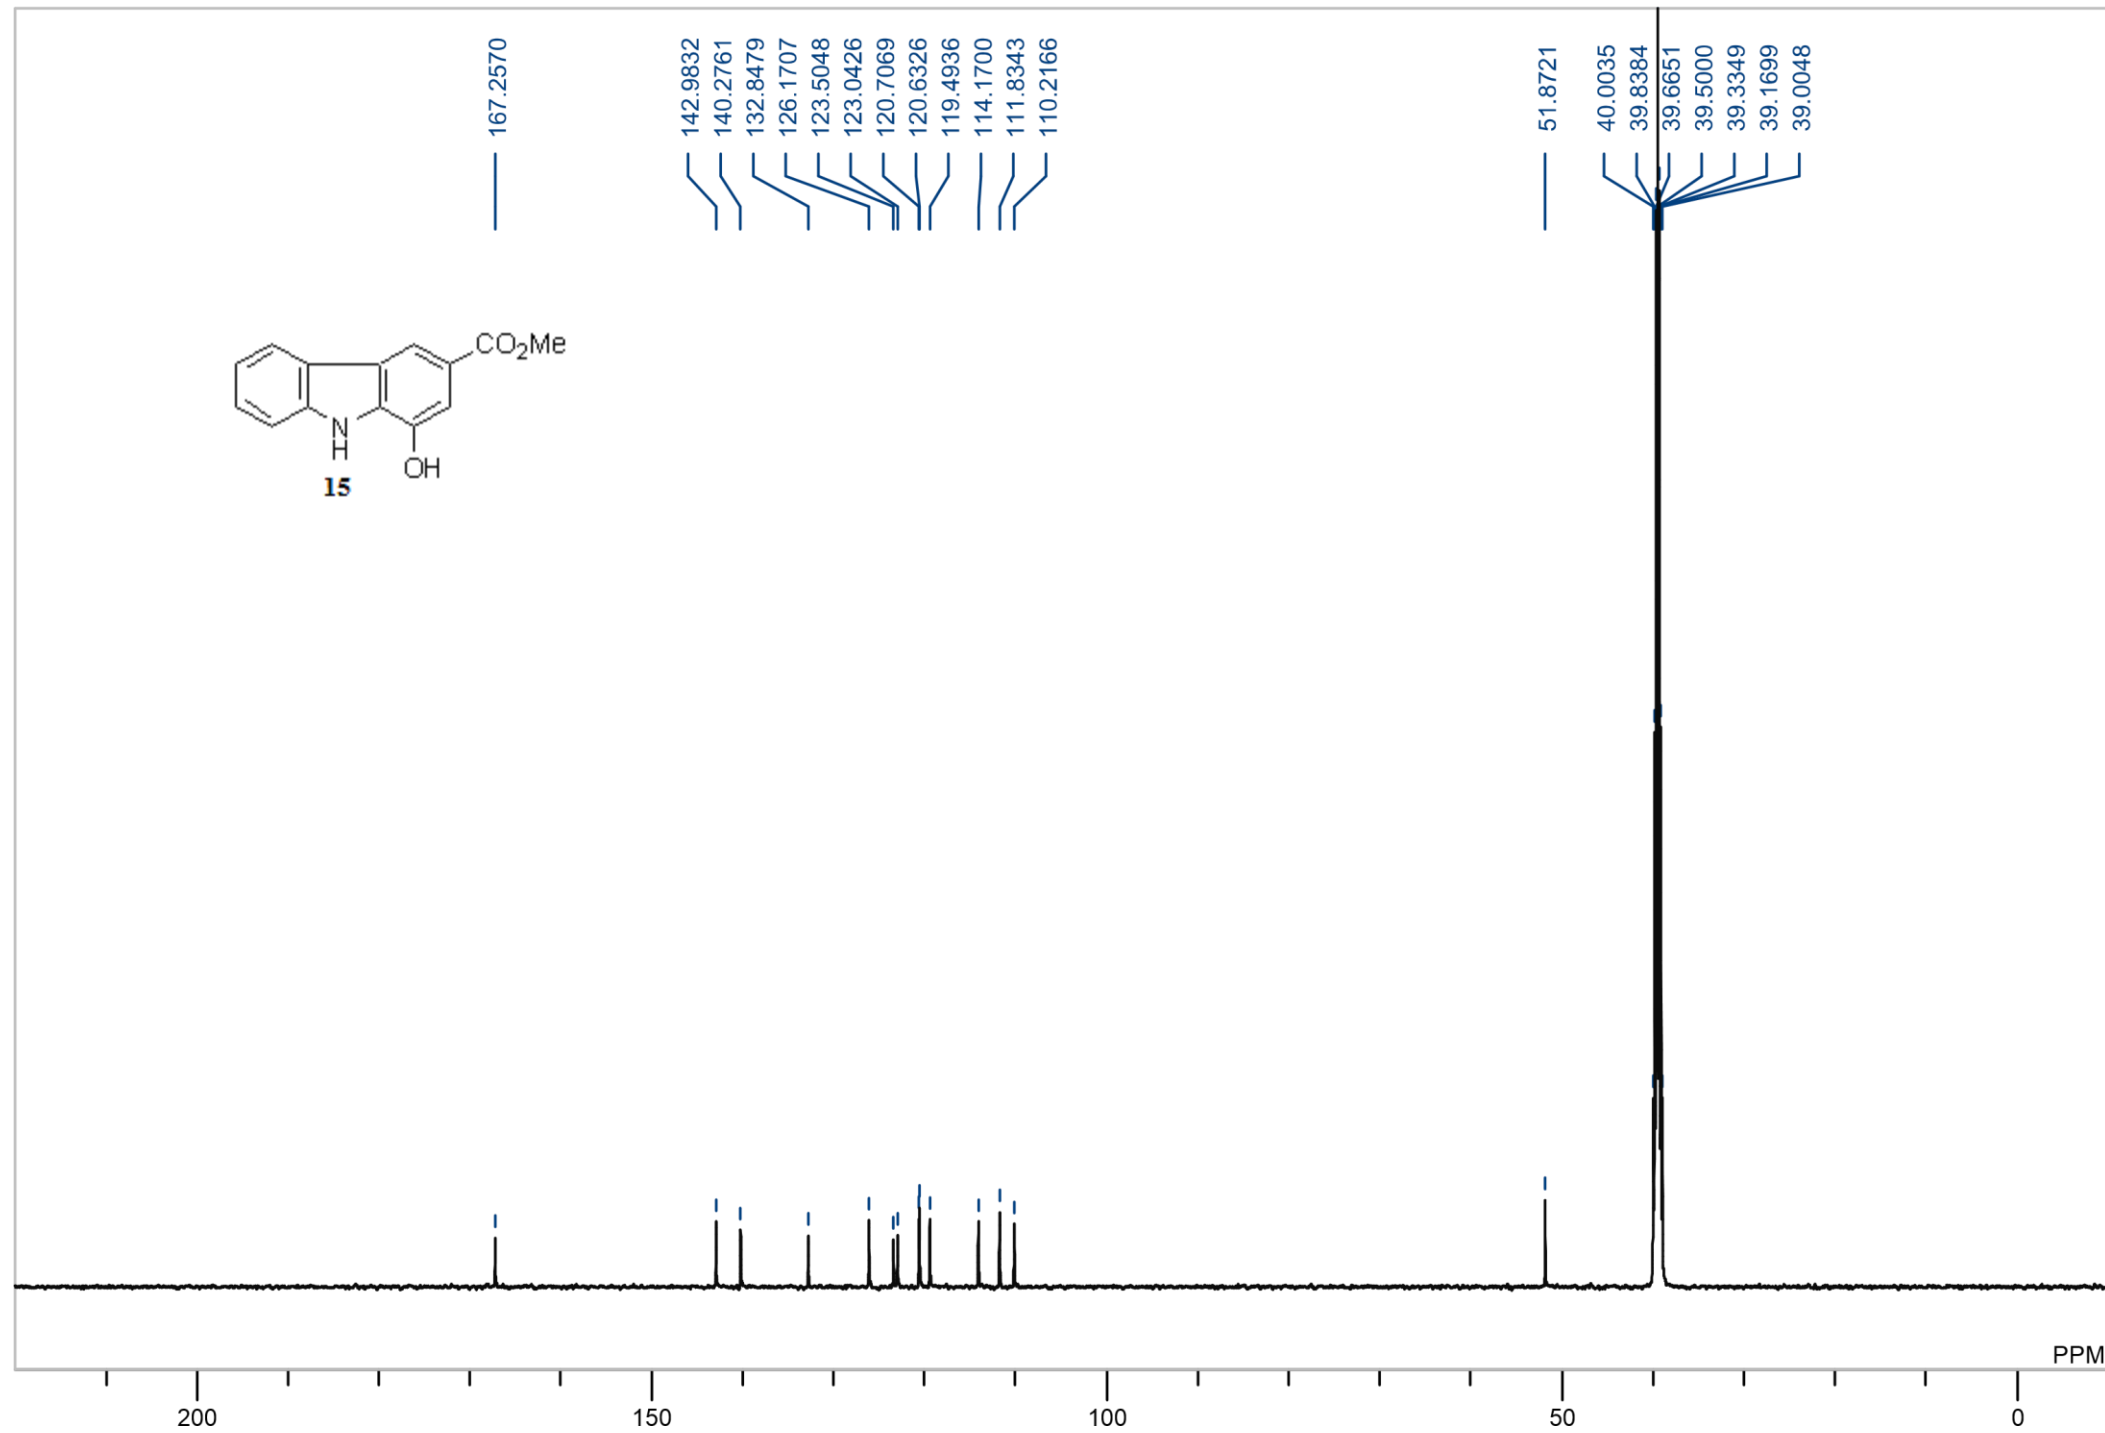

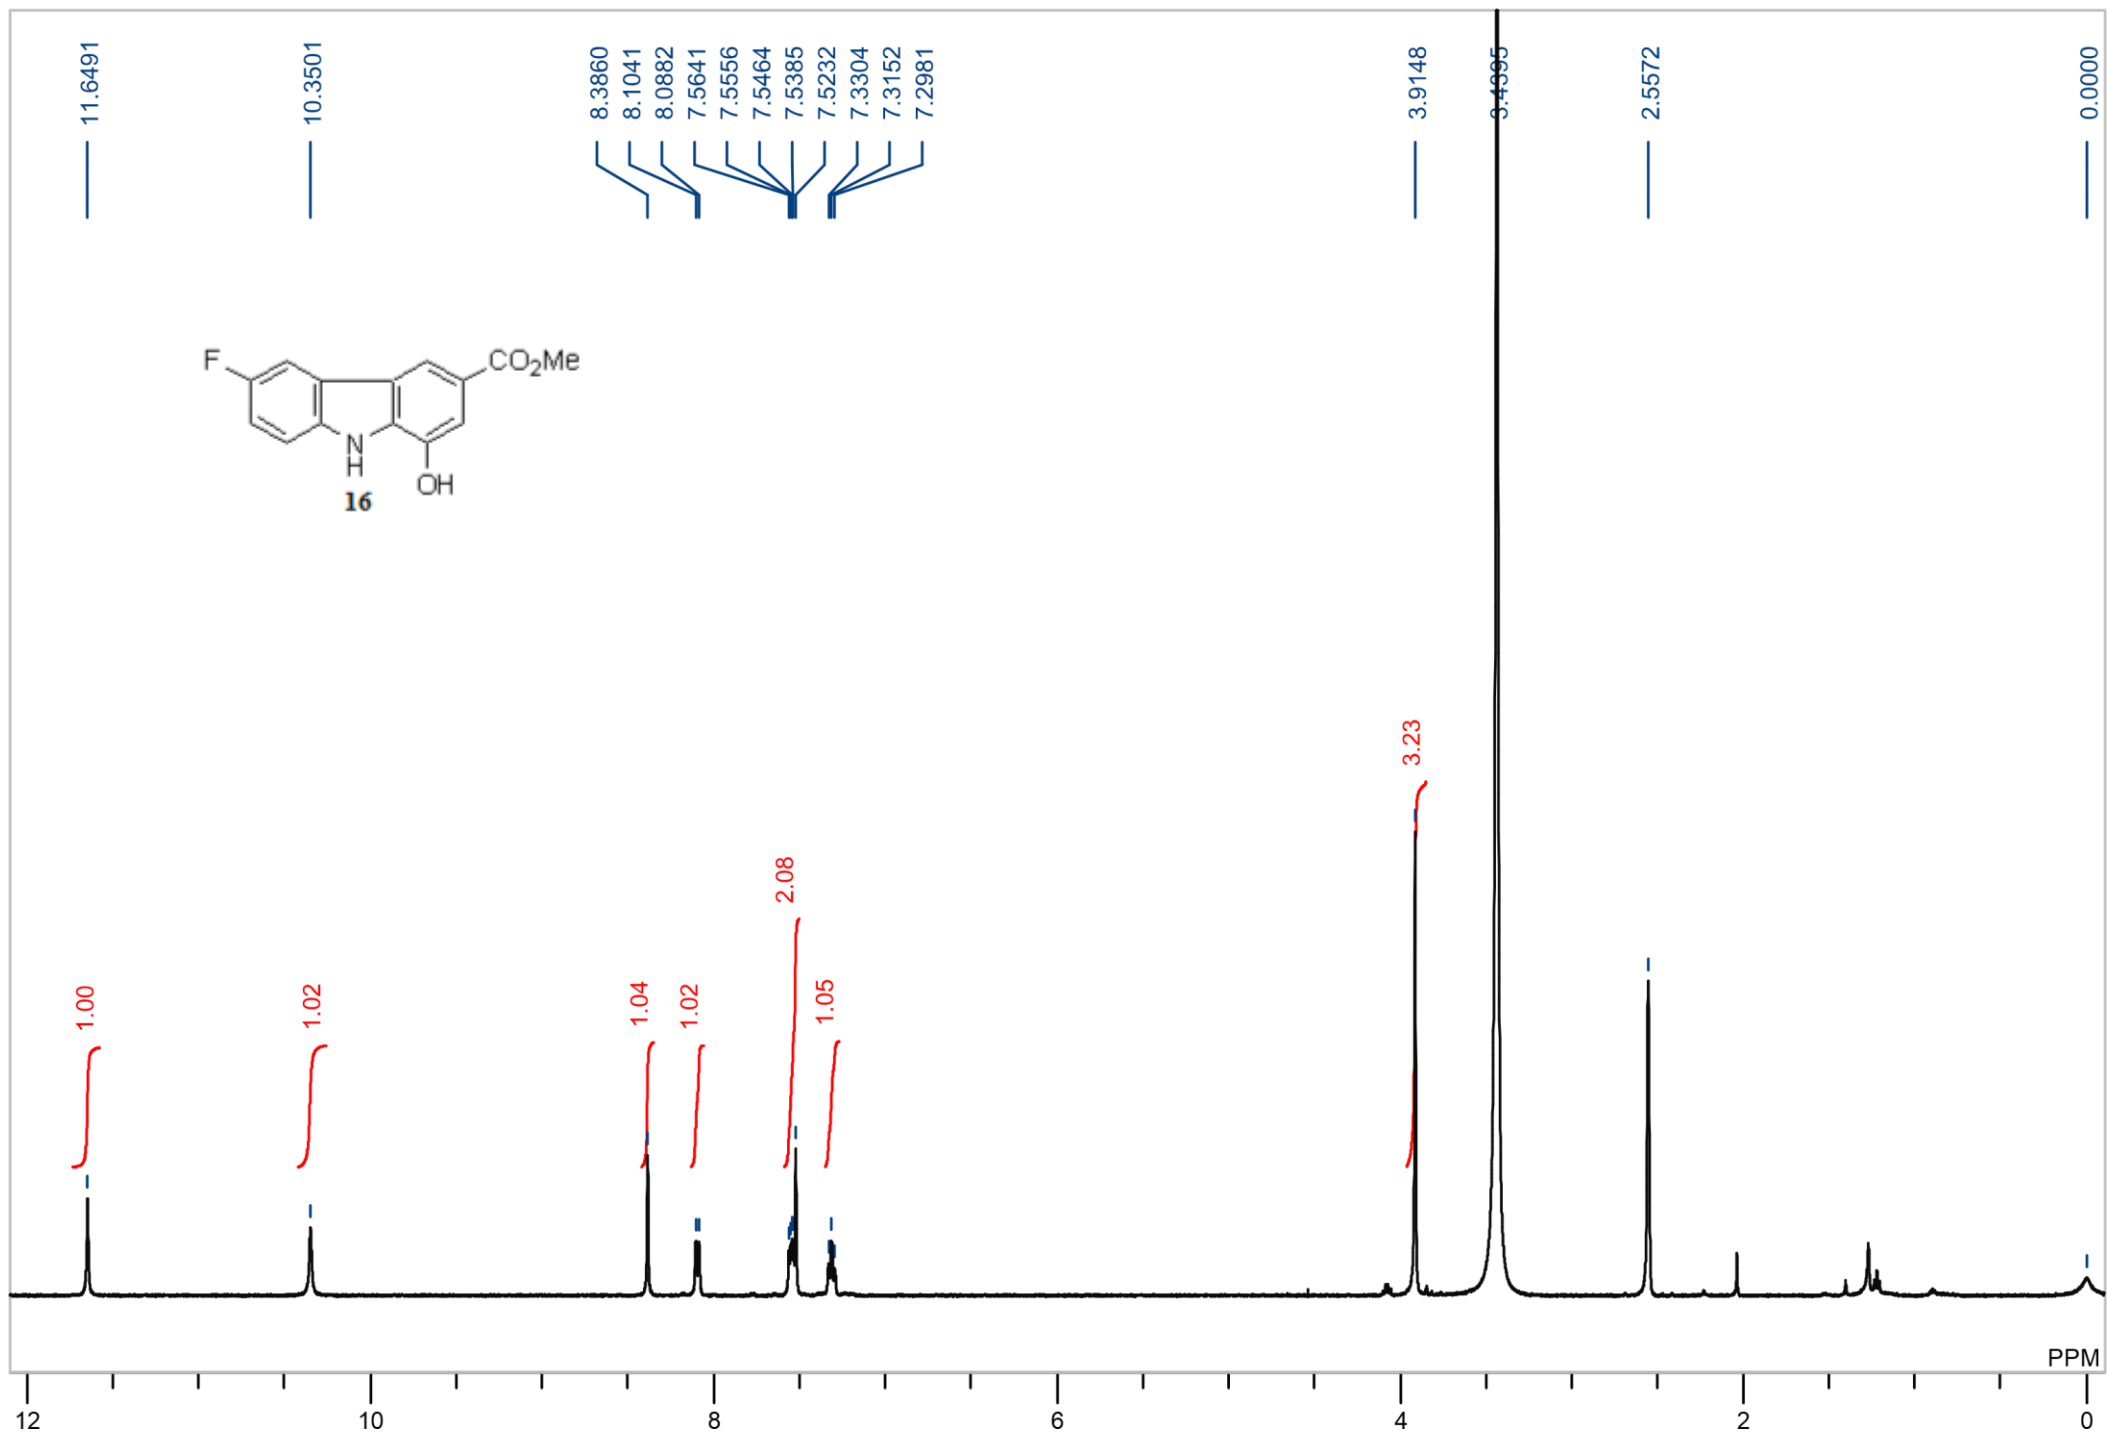

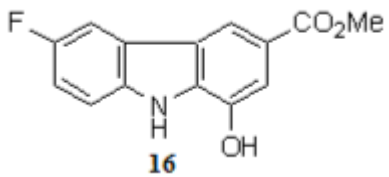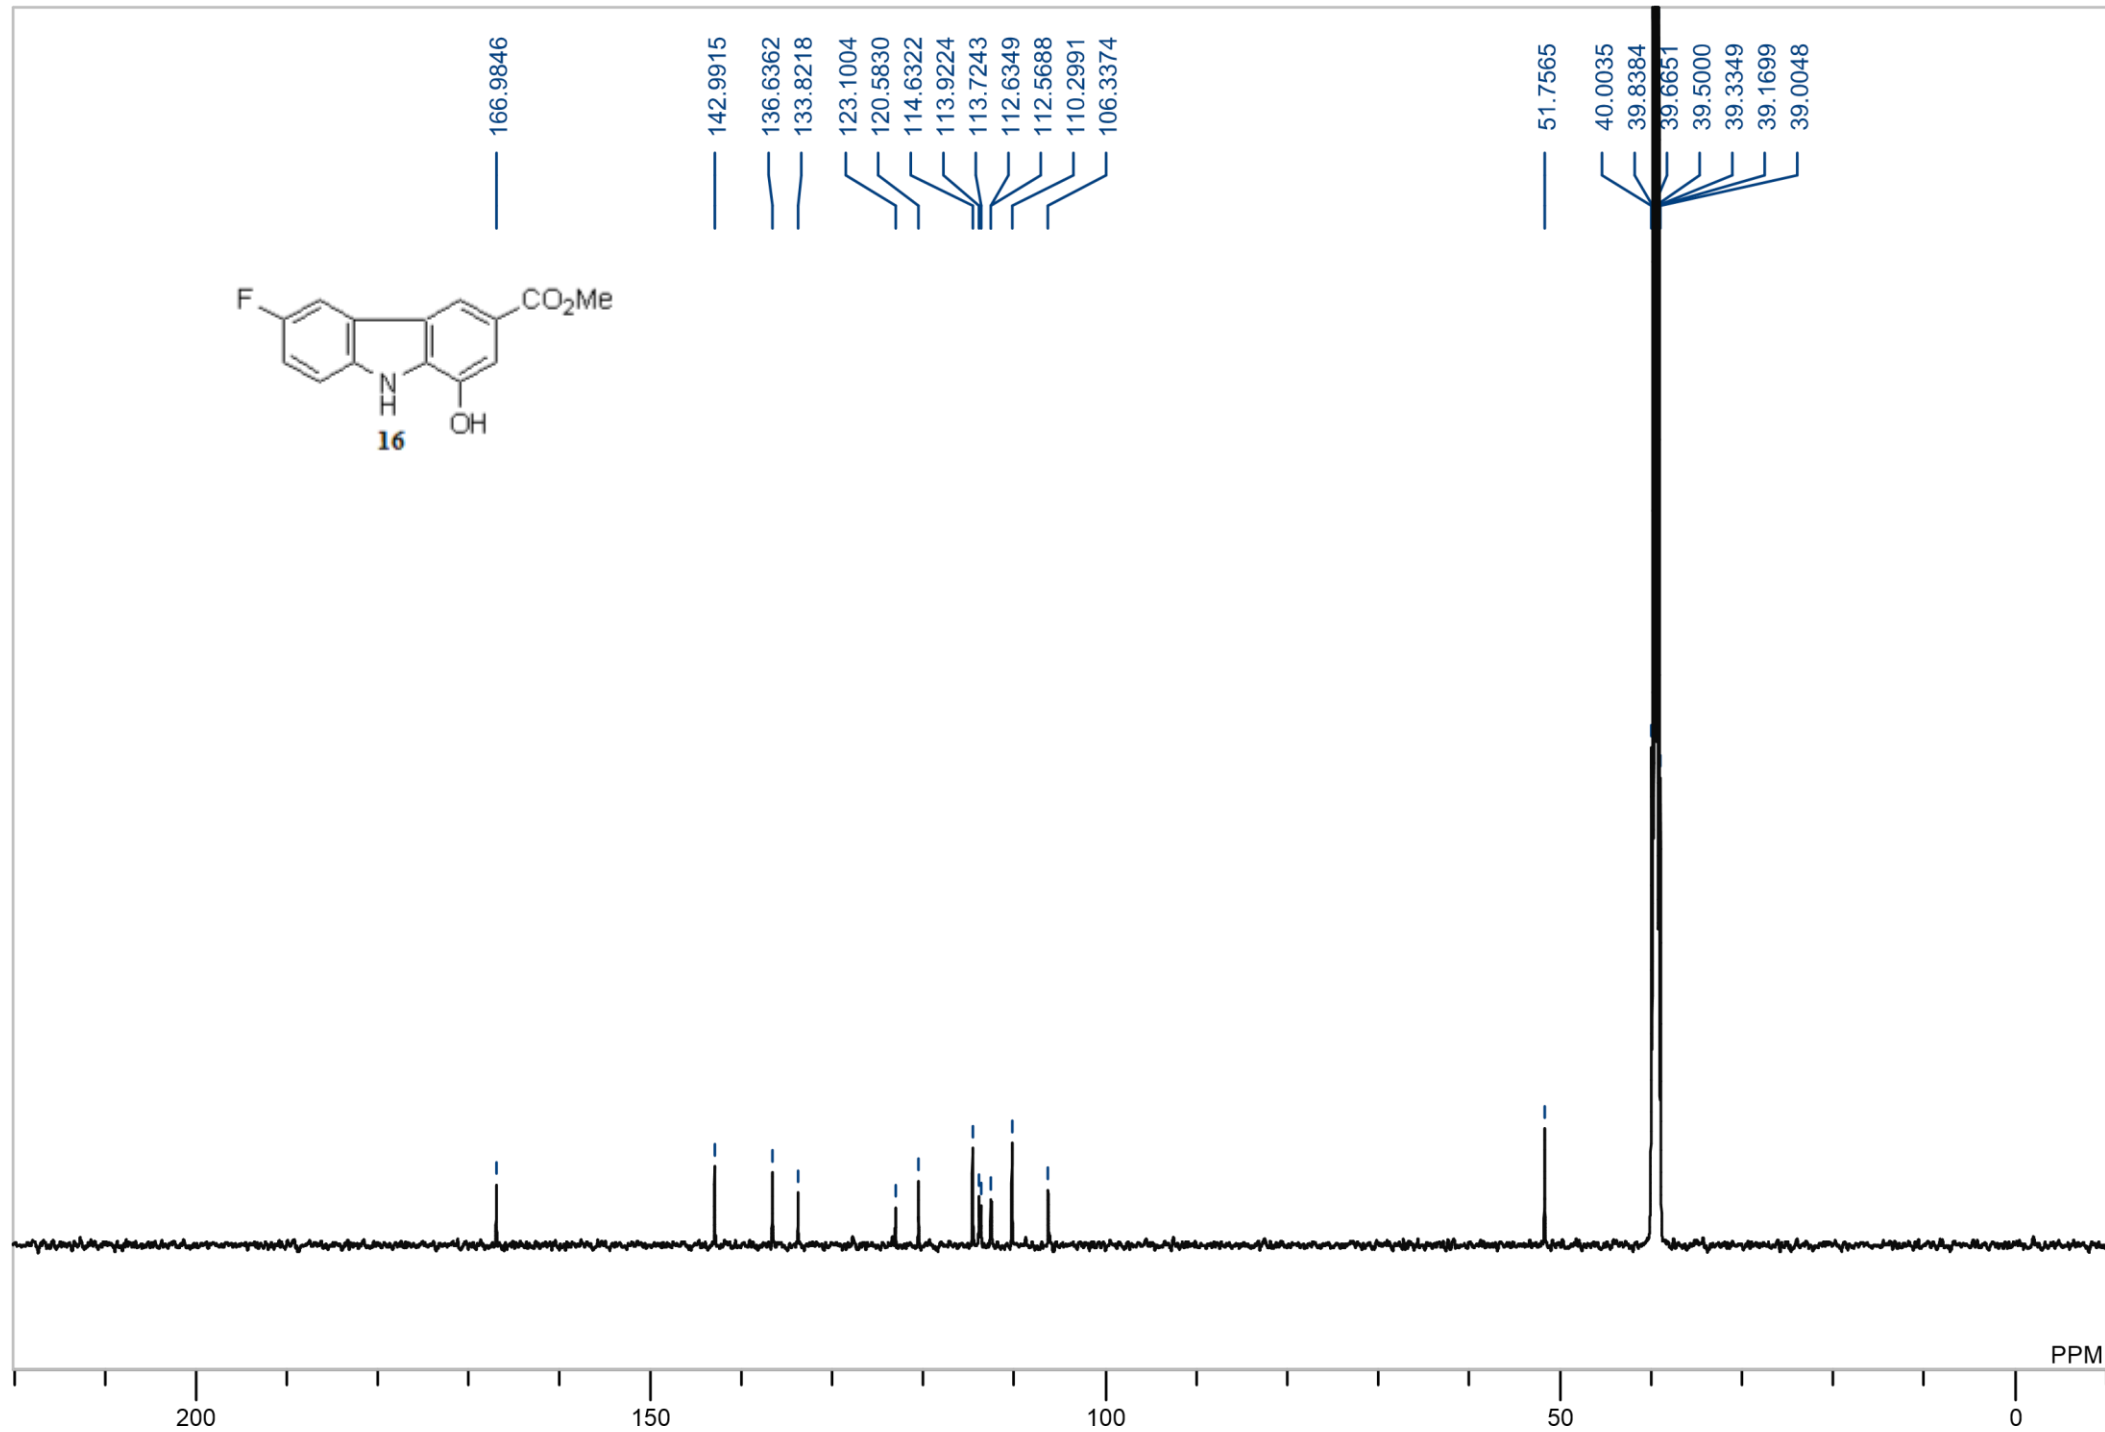

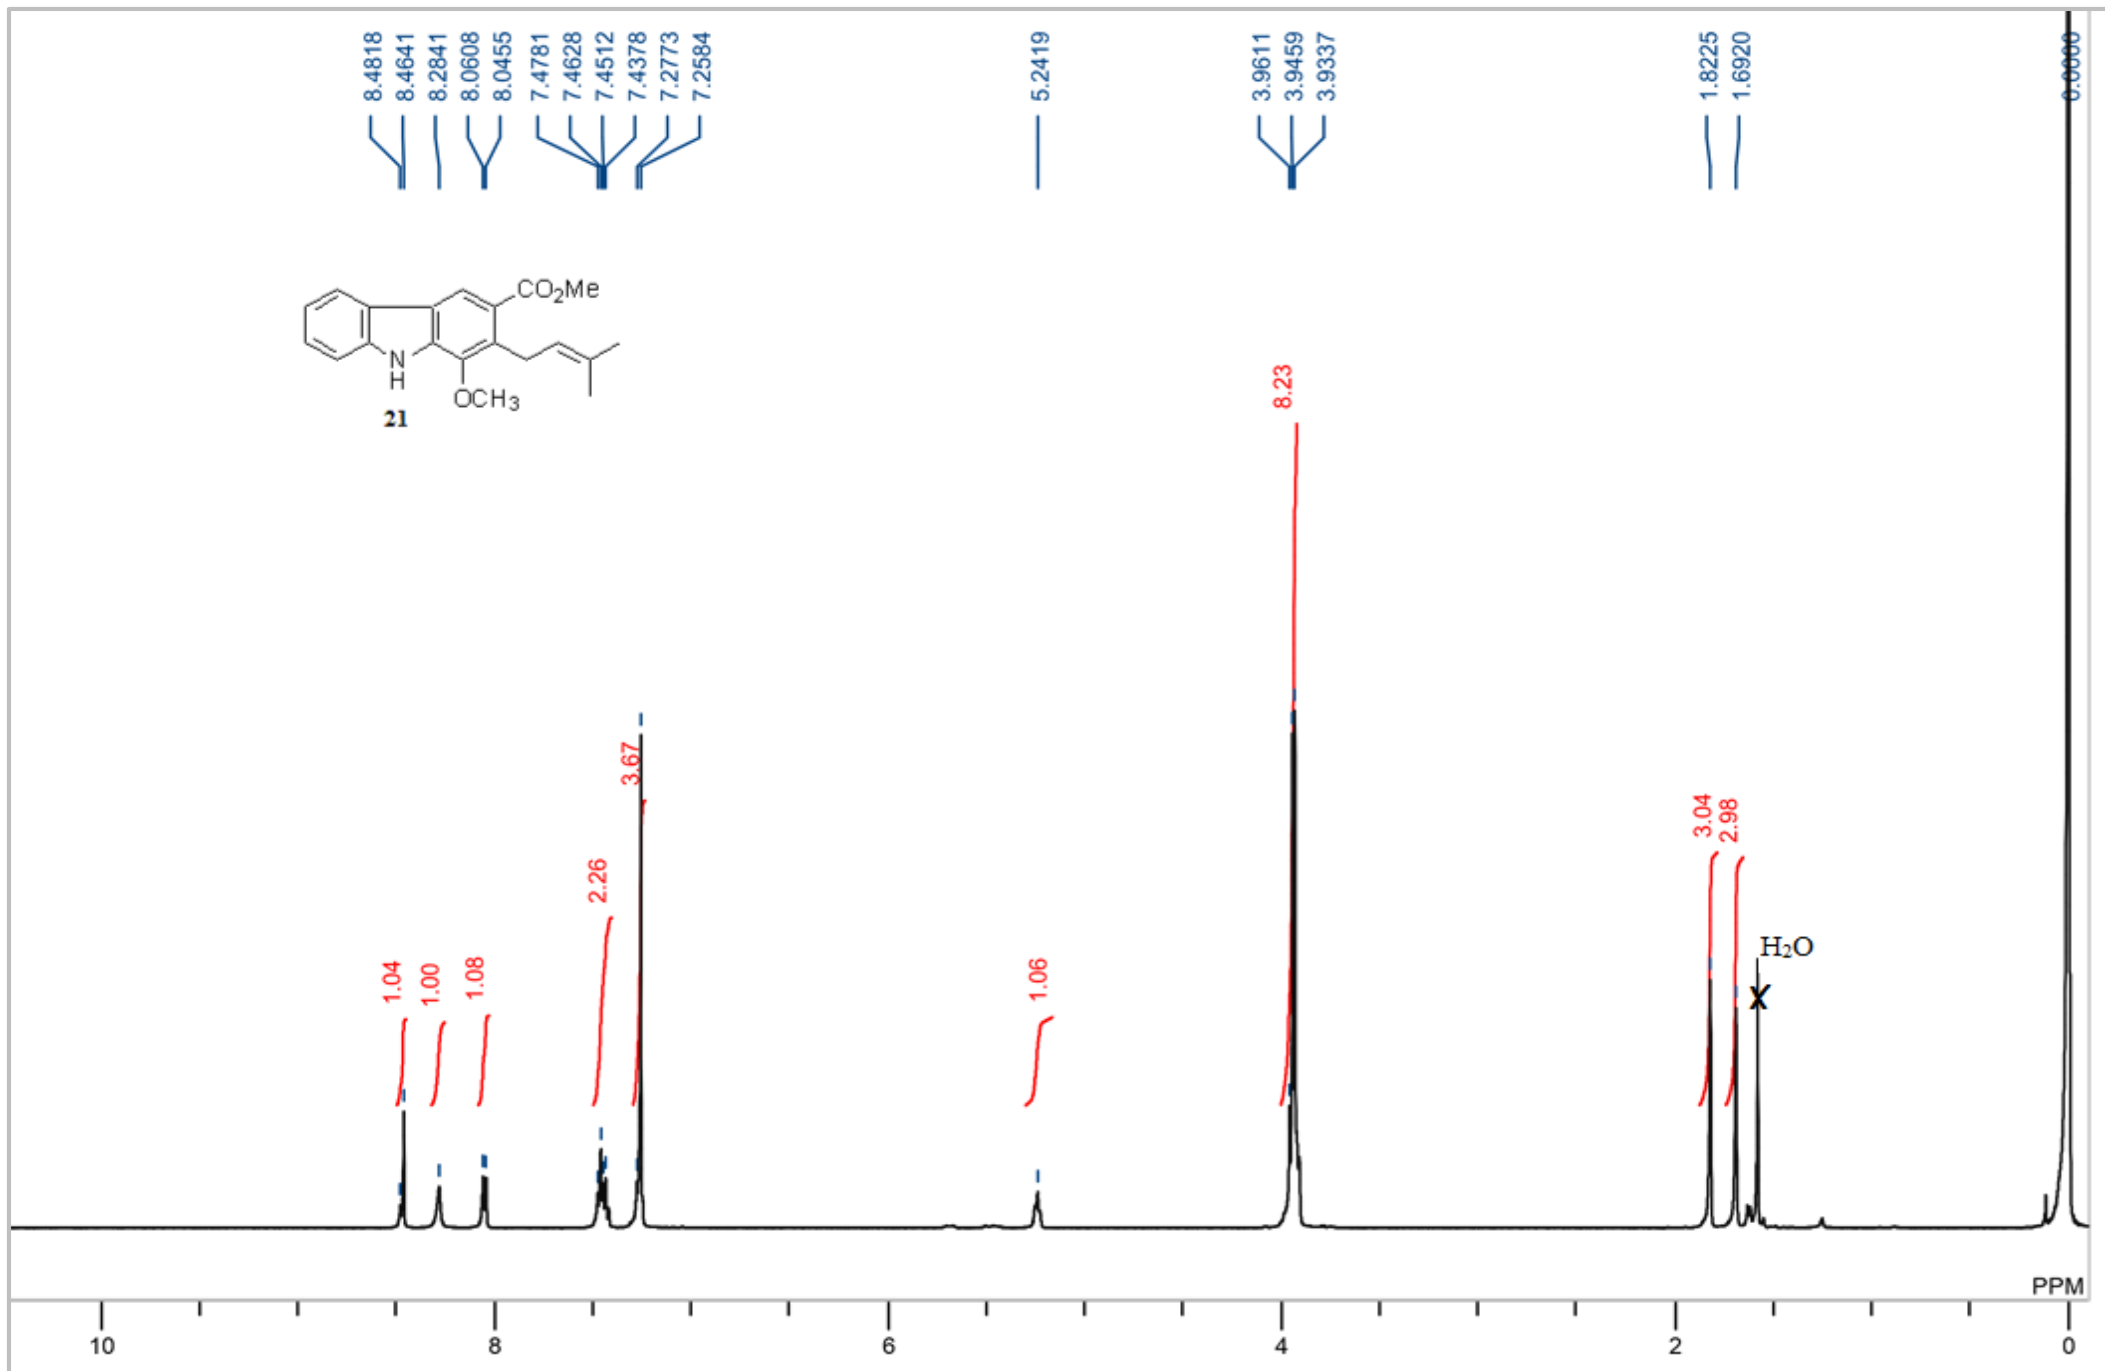

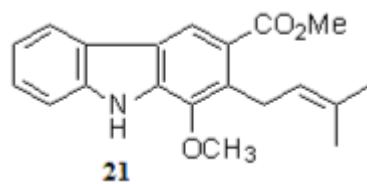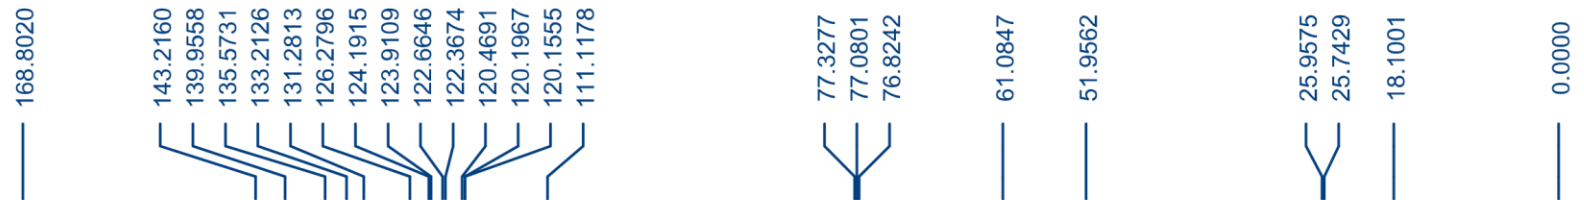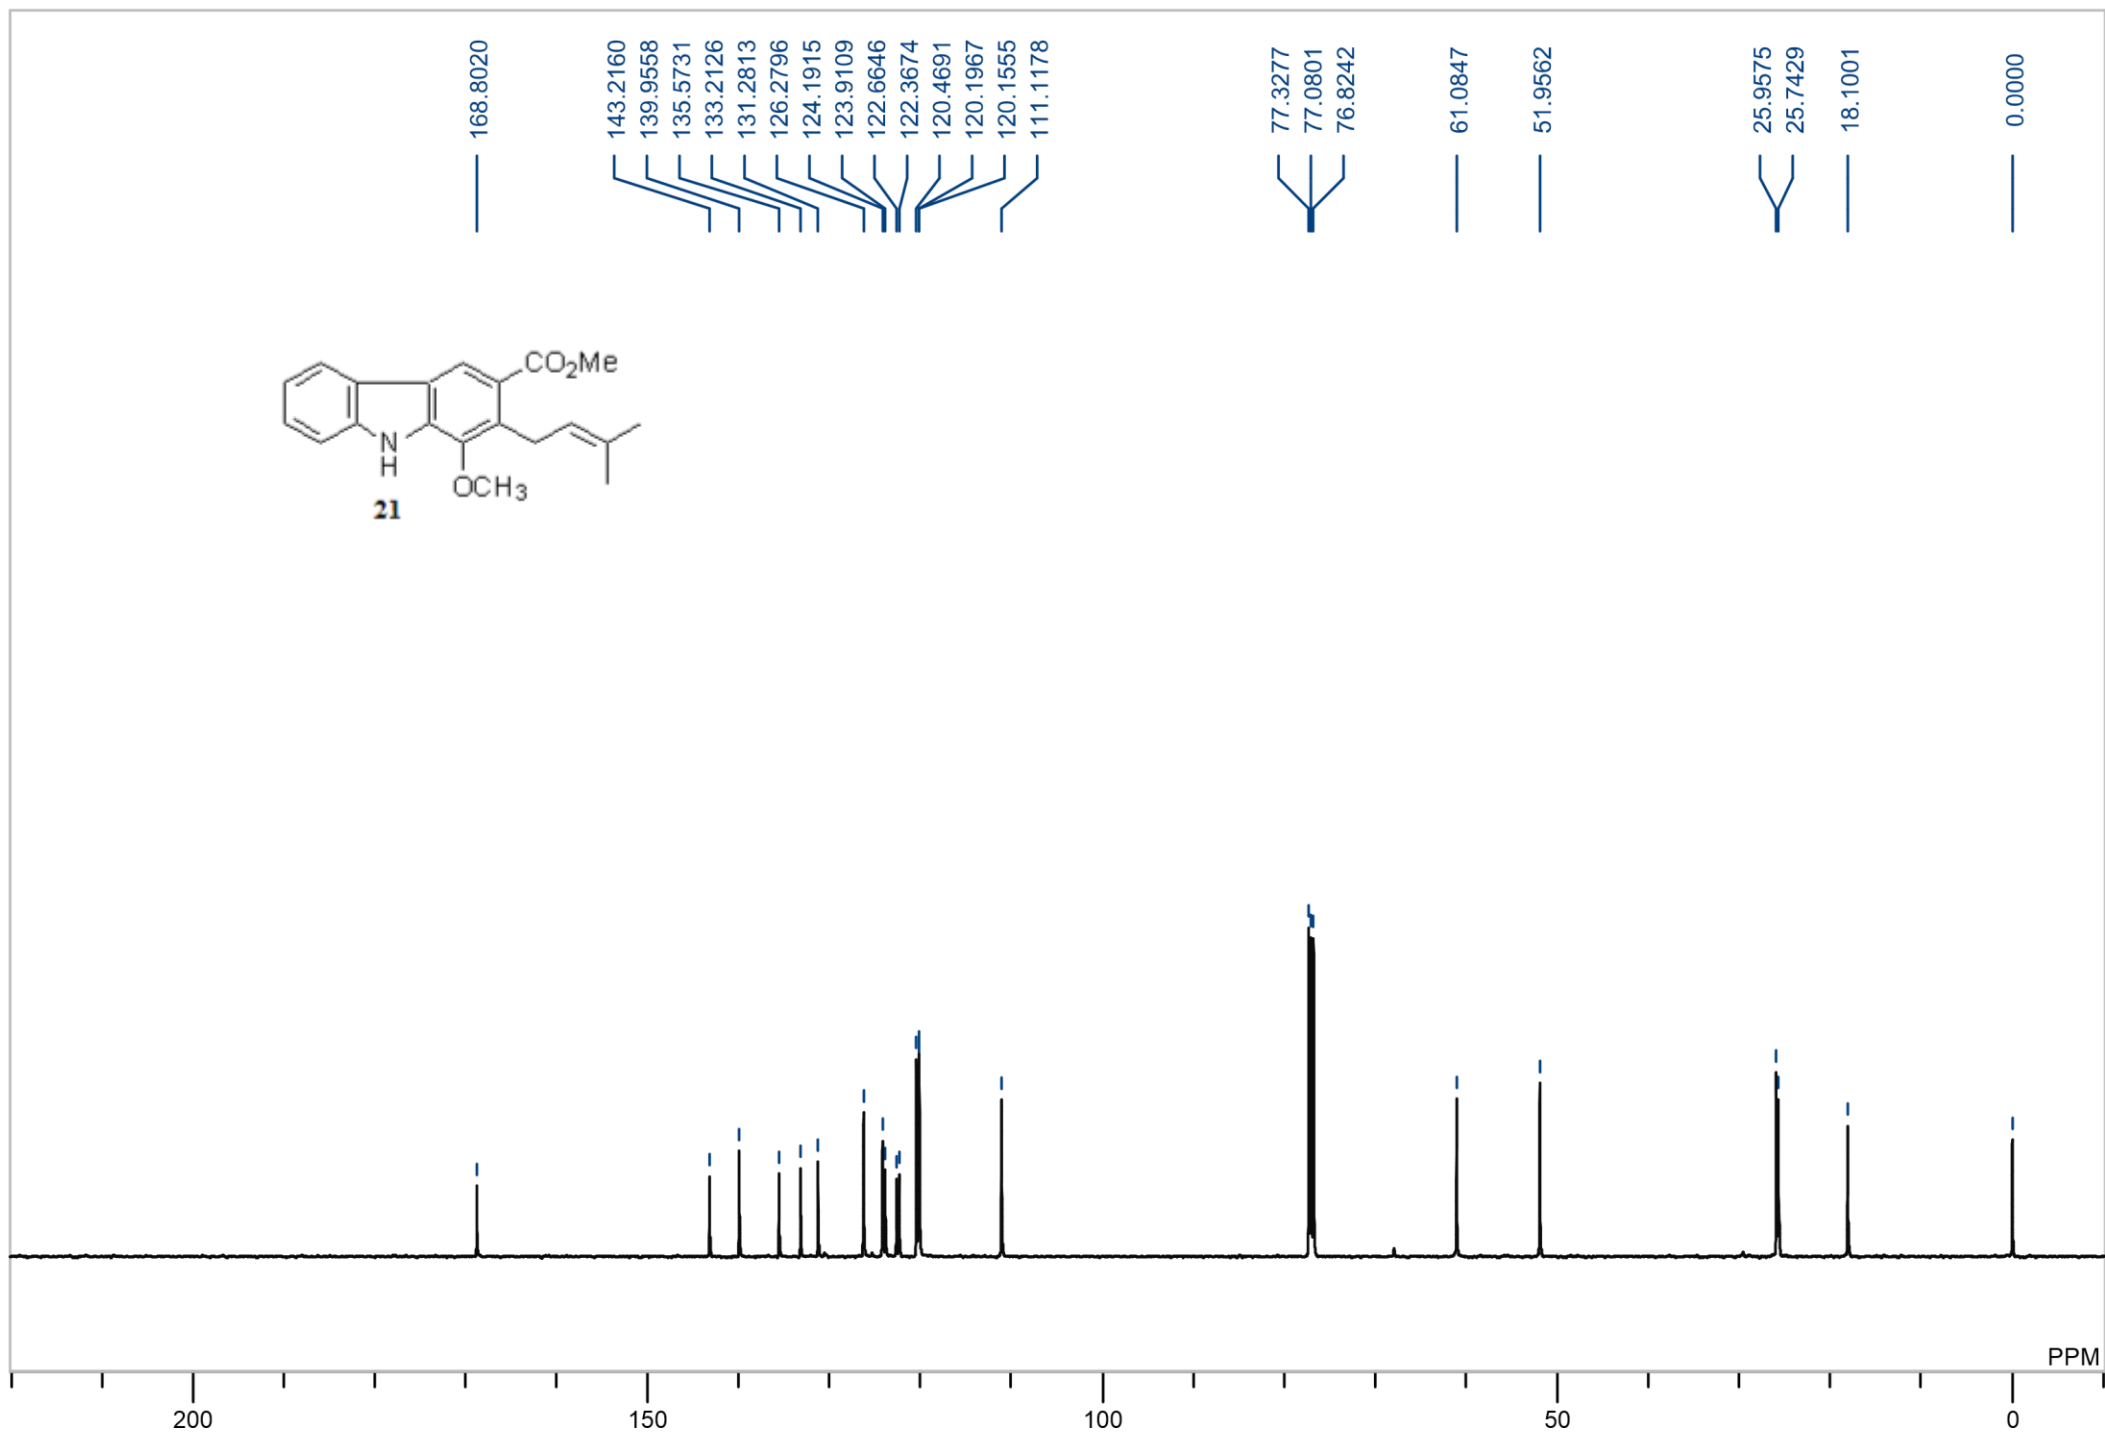

PPM

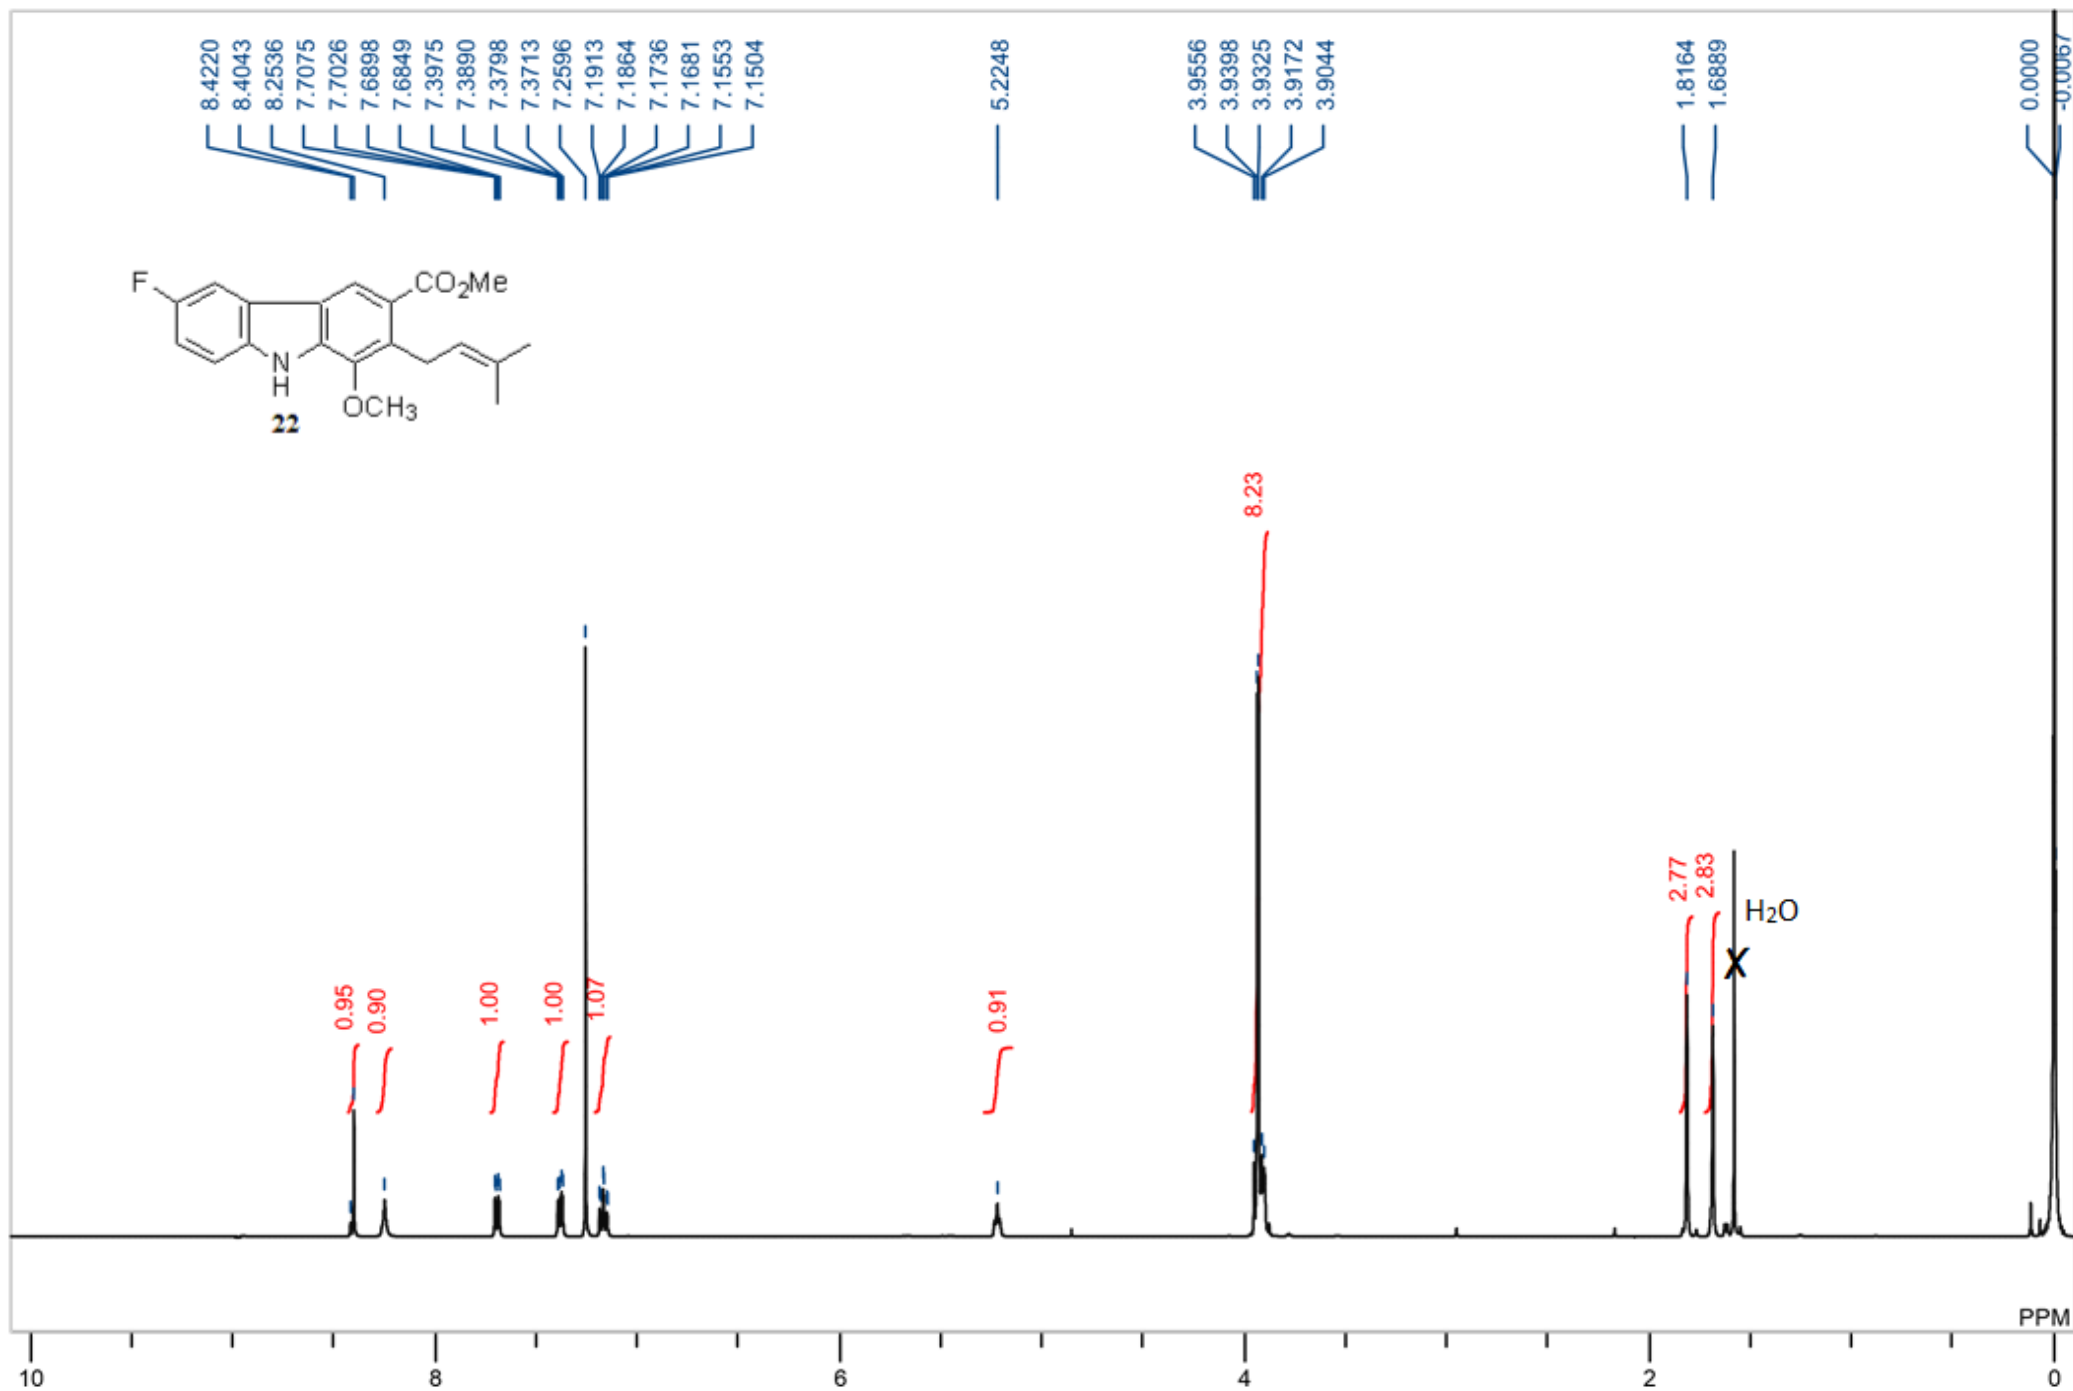

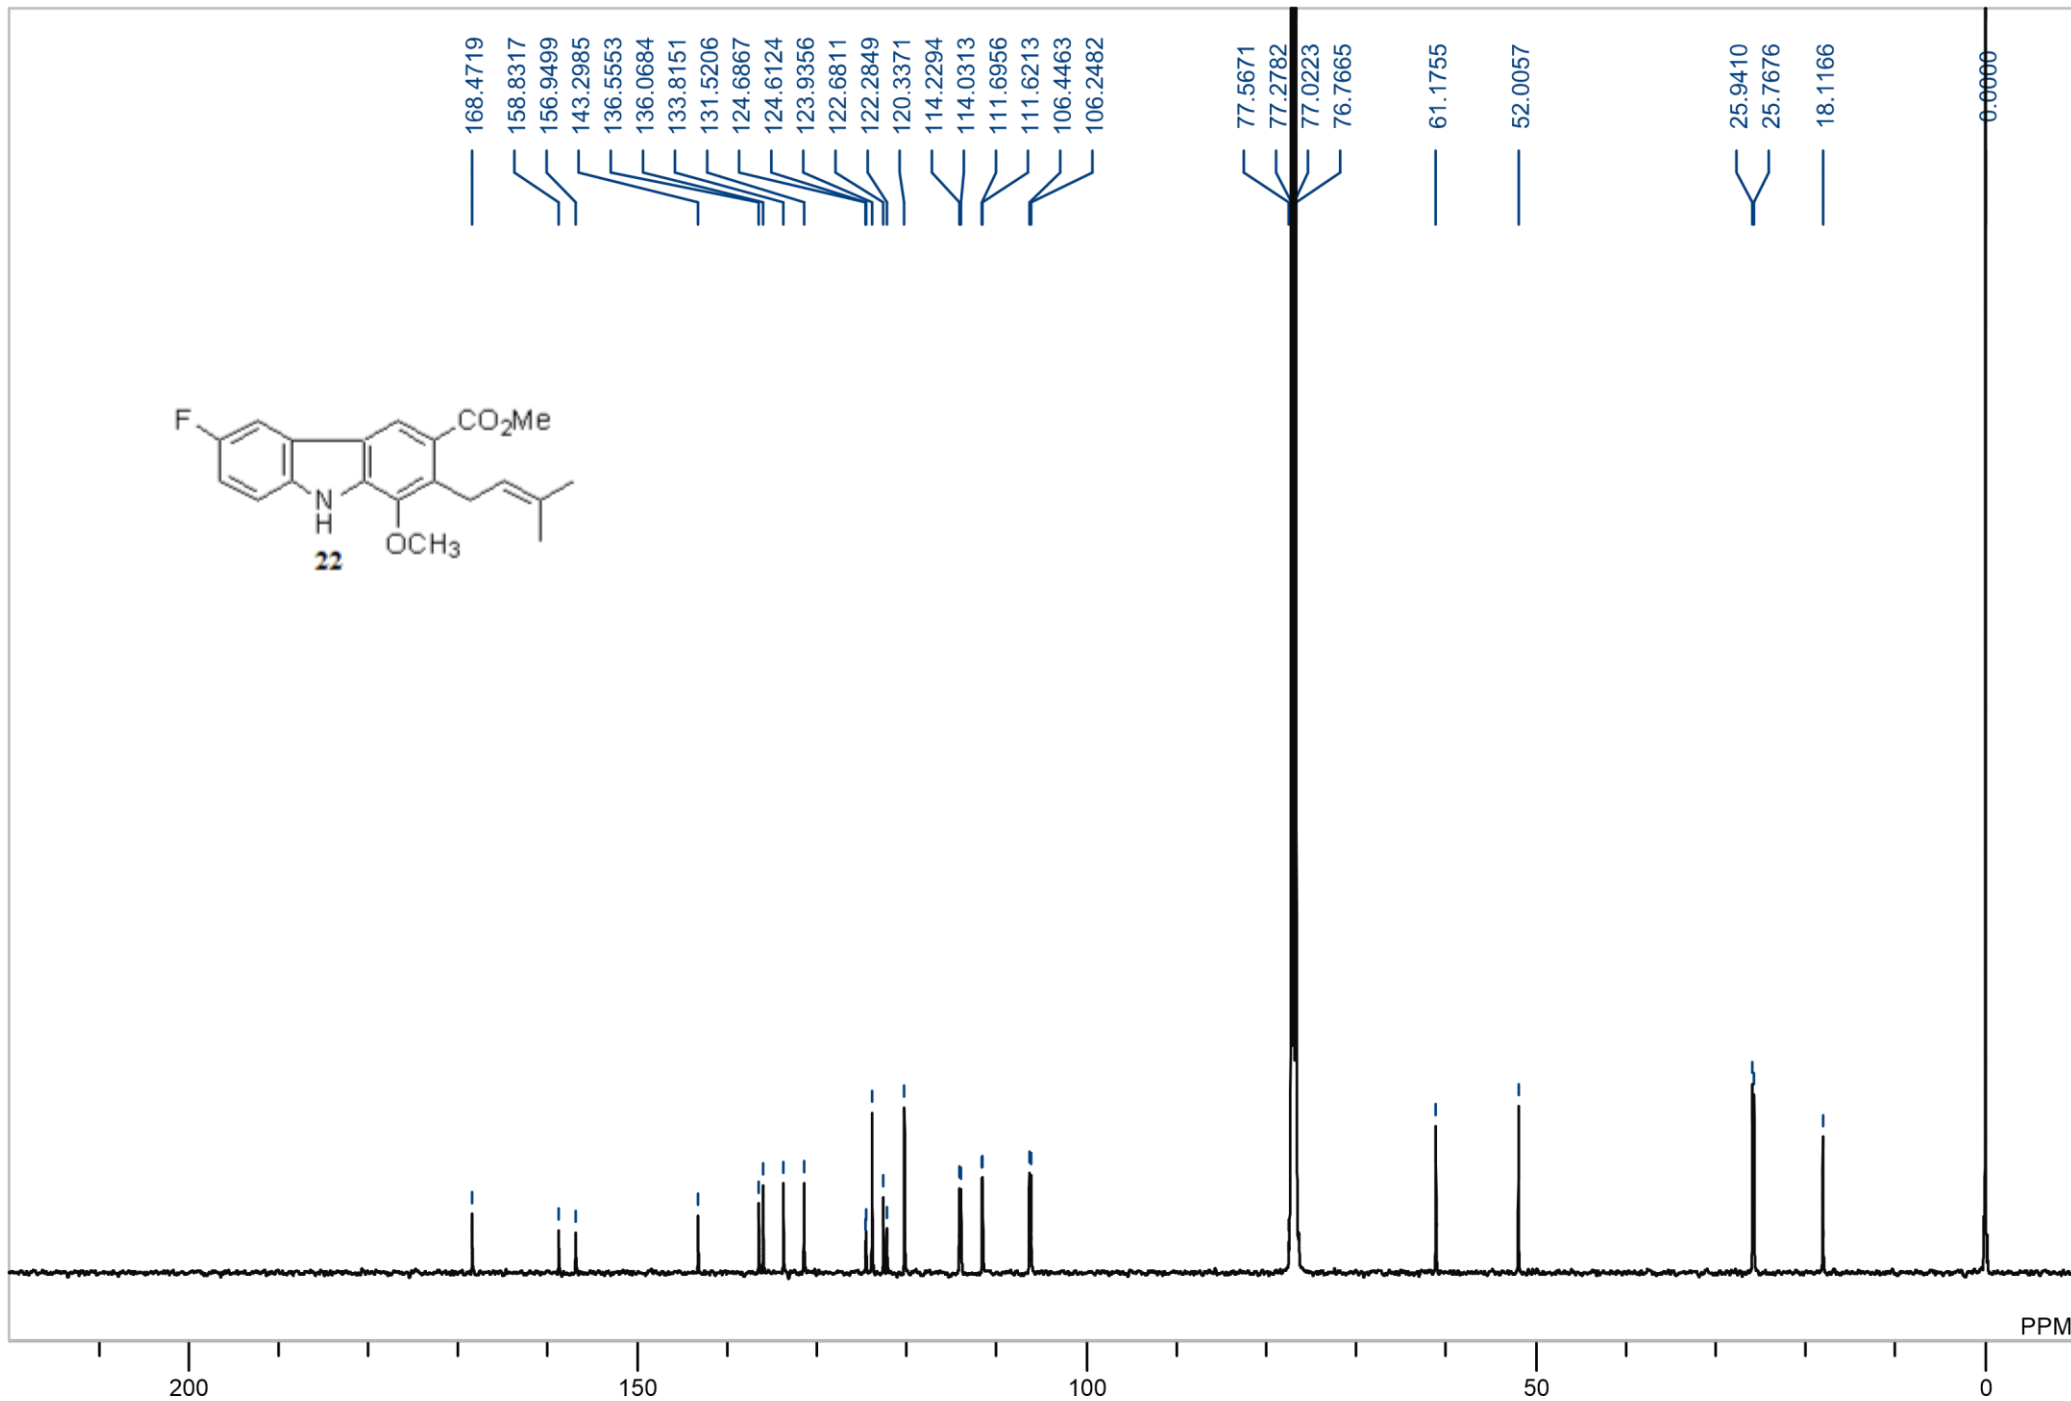



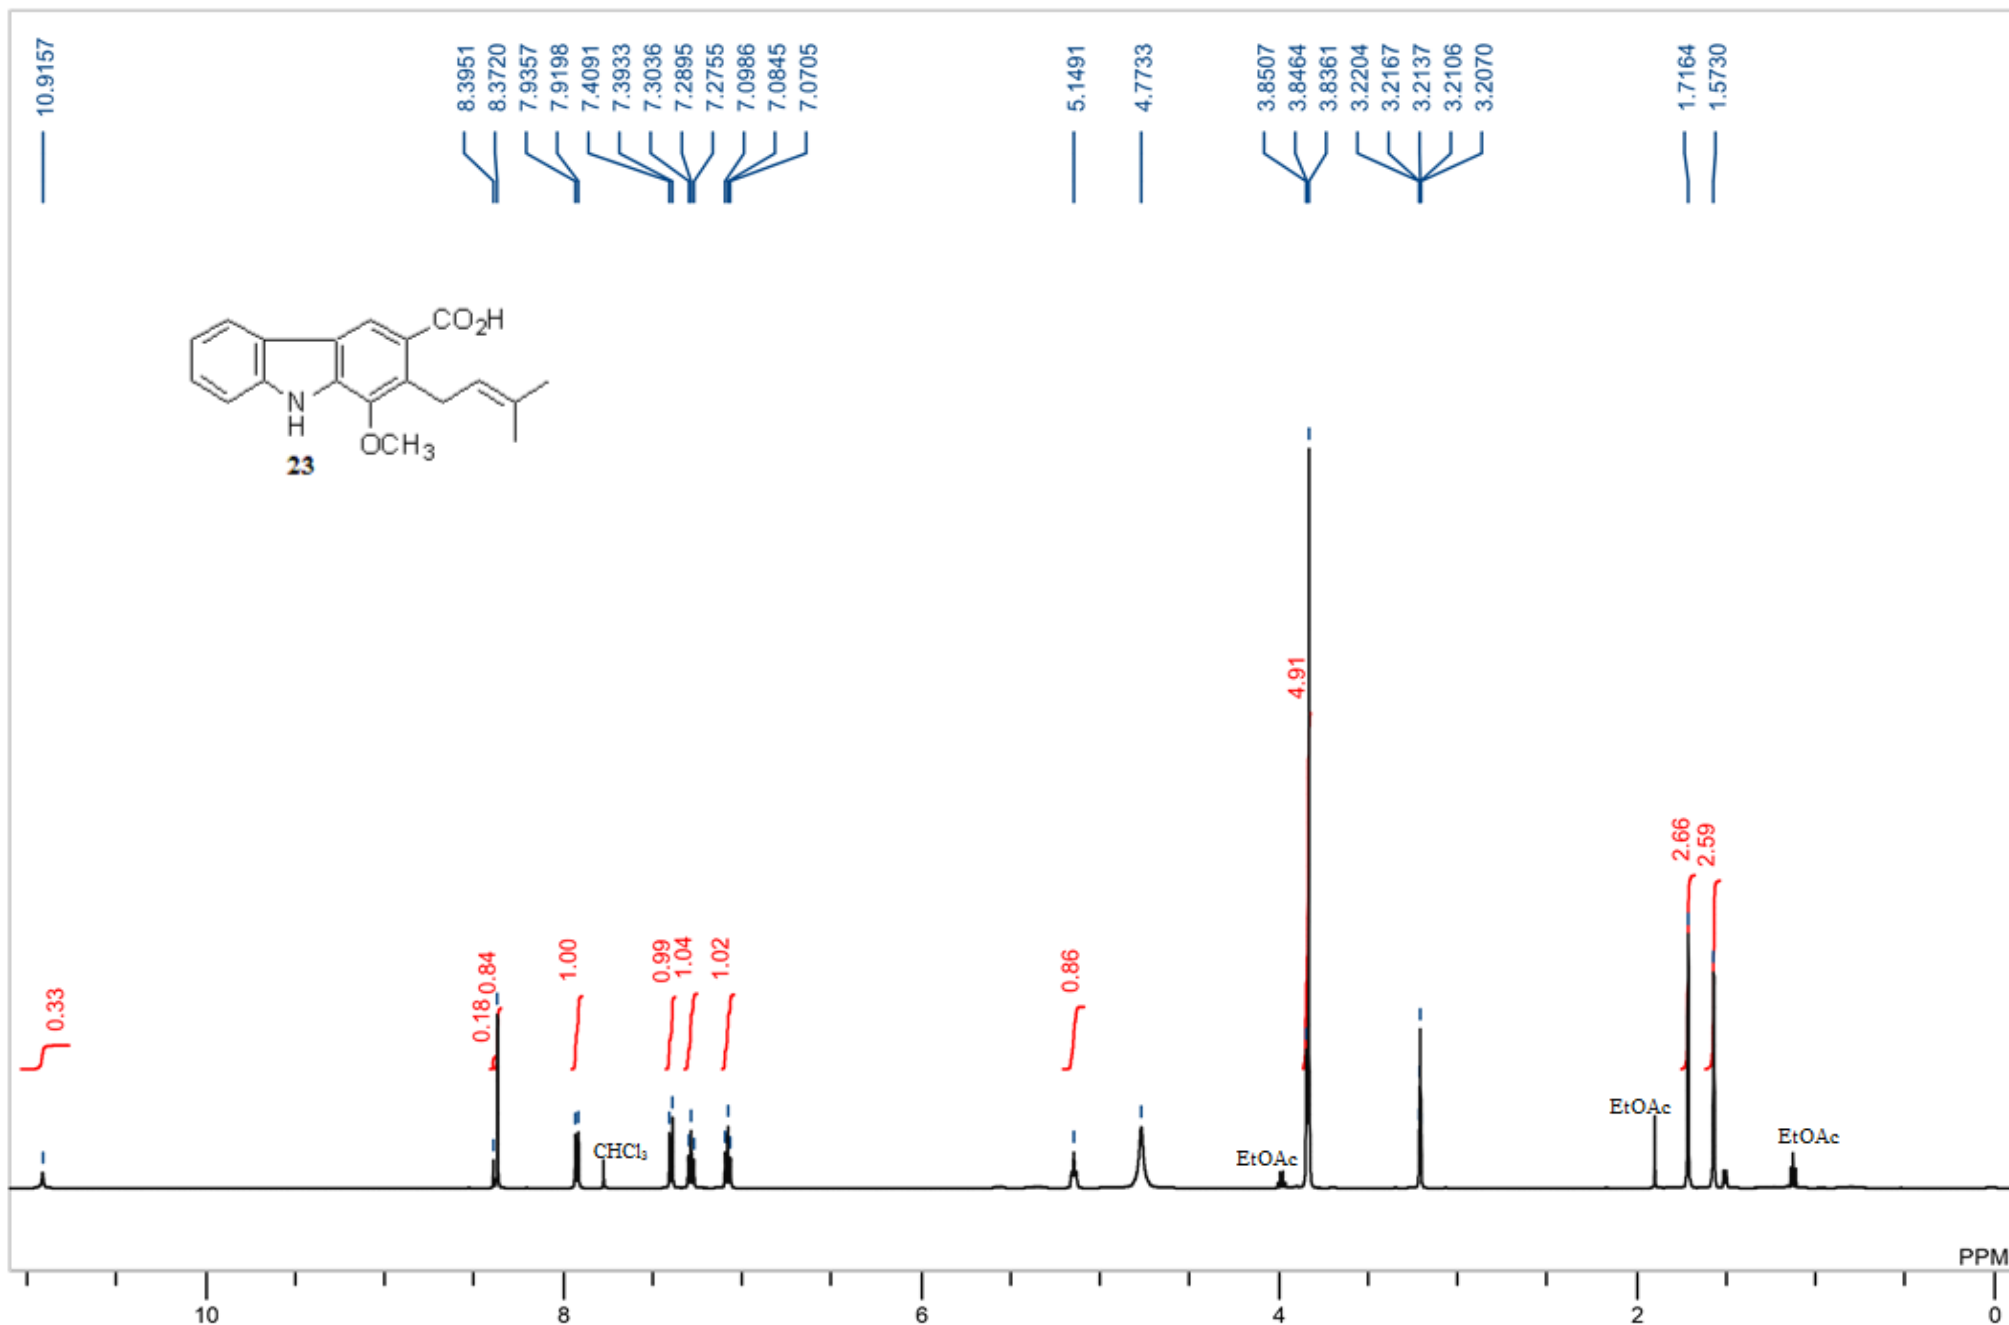

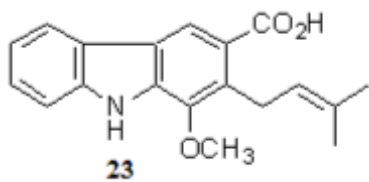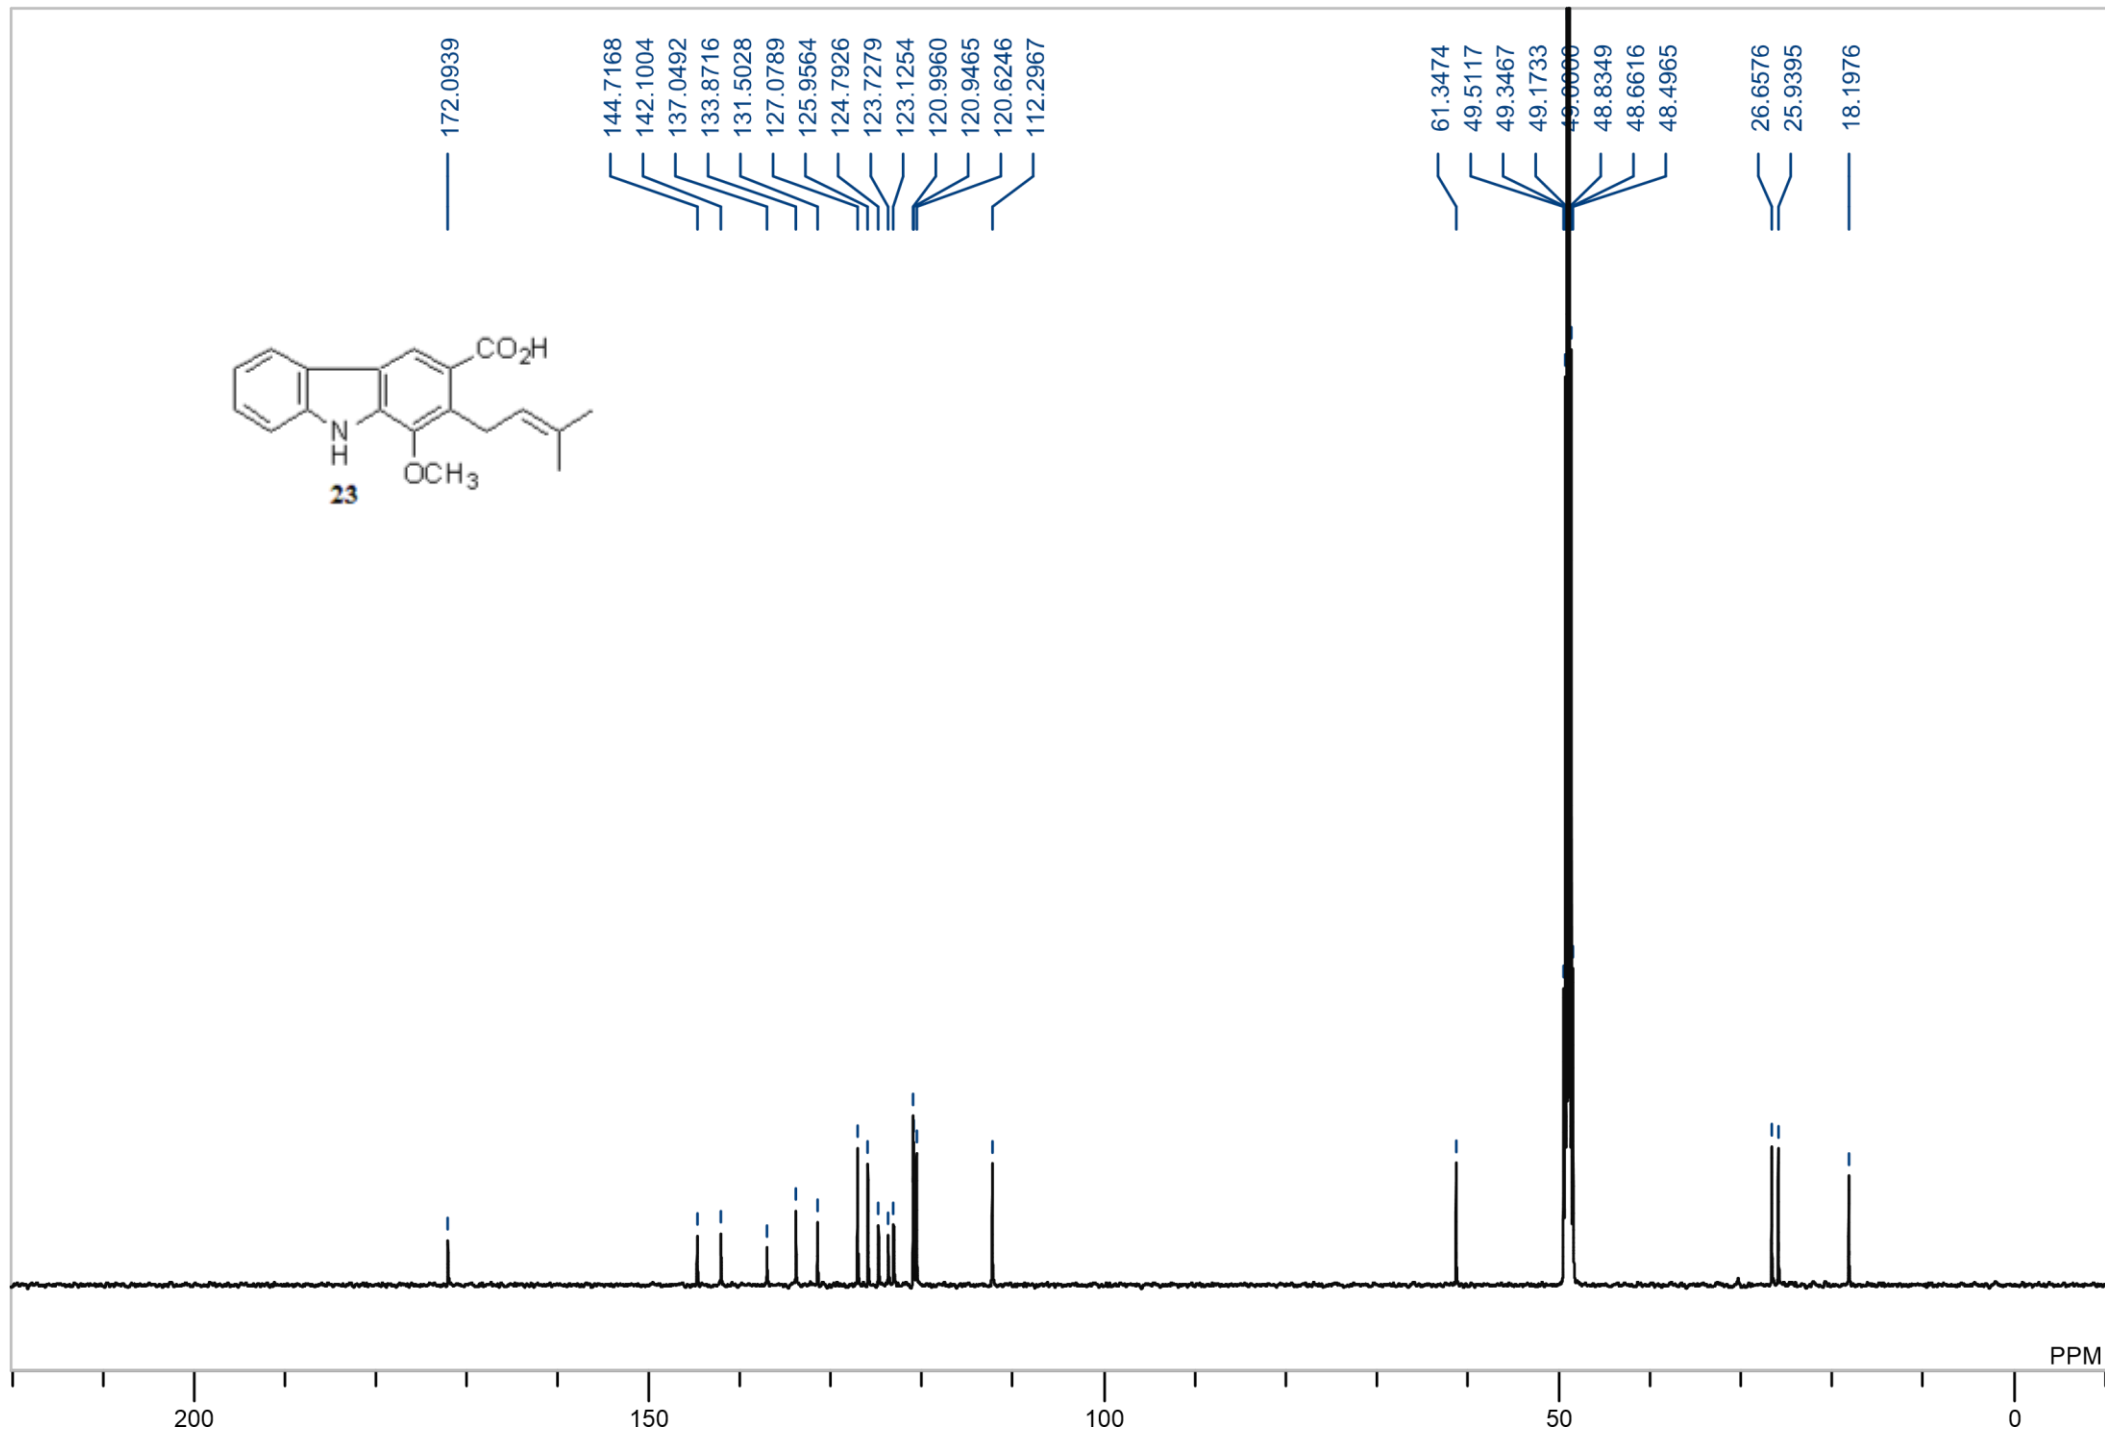

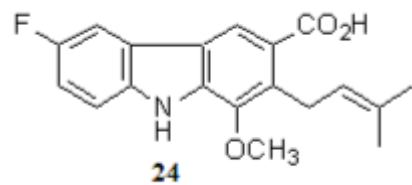

8.4253  
7.7236  
7.7181  
7.7053  
7.7004  
7.4491  
7.4405  
7.4314  
7.4228  
7.1617  
7.1568  
7.1440  
7.1391  
7.1257  
7.1208

5.2214

4.8620

3.9095

3.3061  
3.3031  
3.3000  
3.2963  
3.2933

1.7941  
1.6544

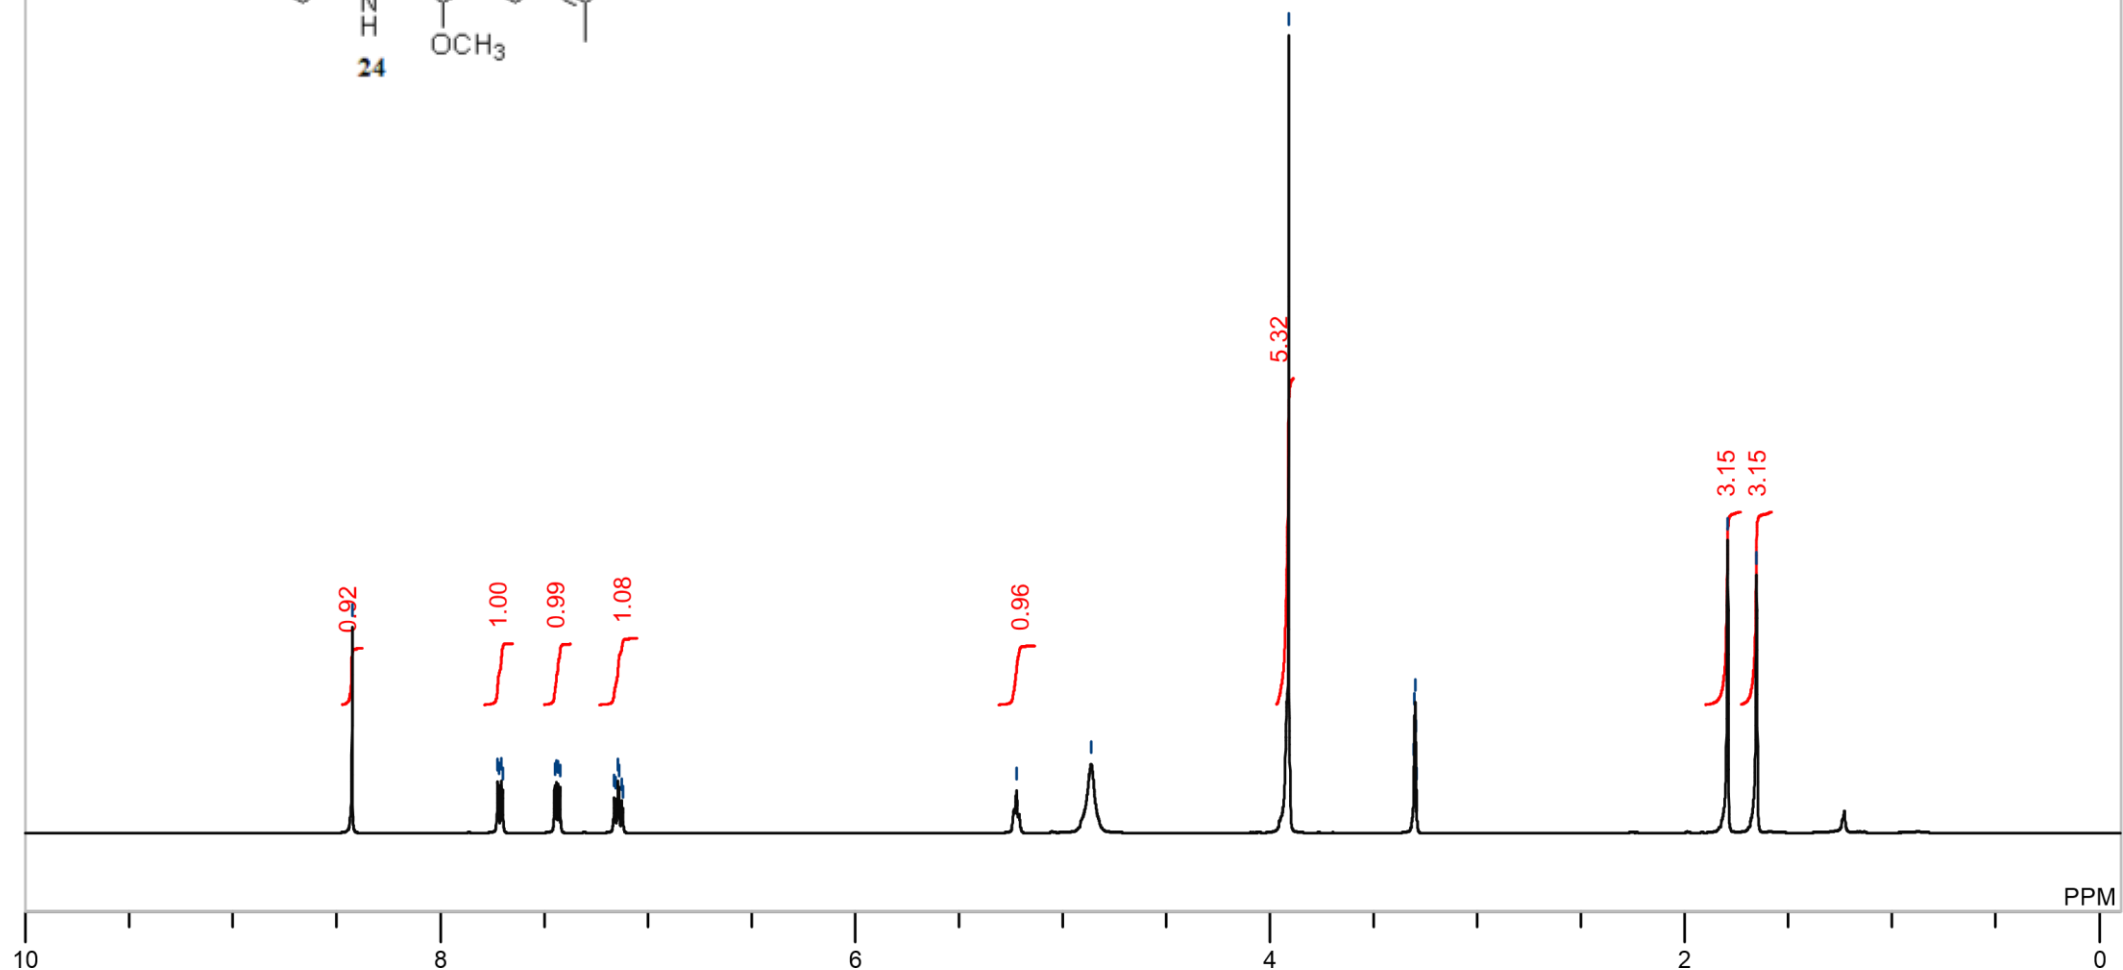

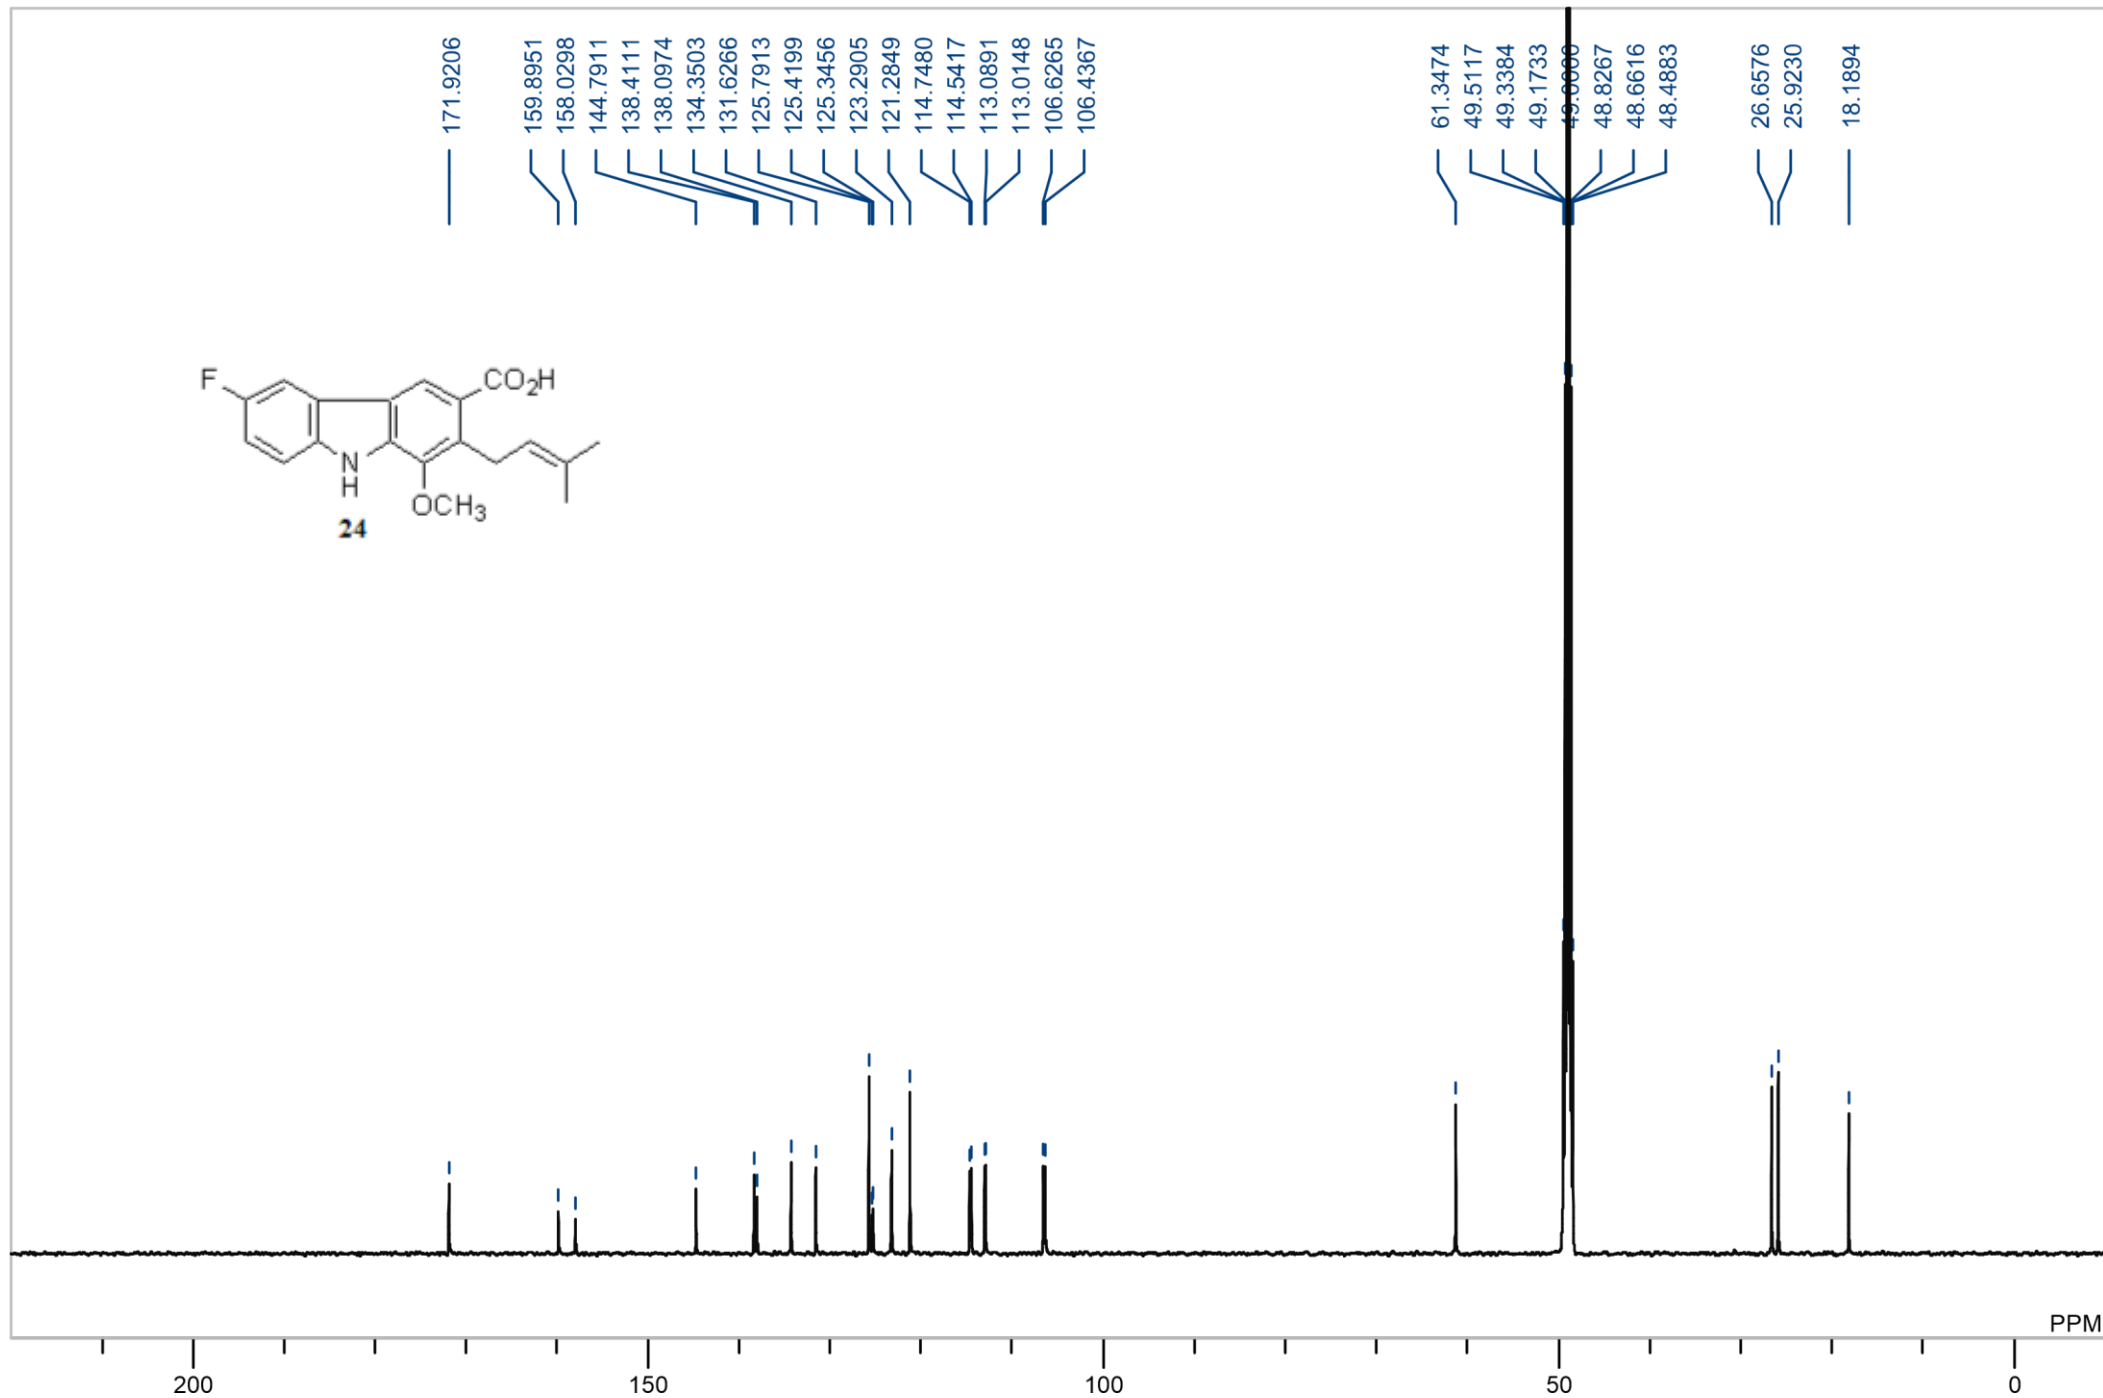

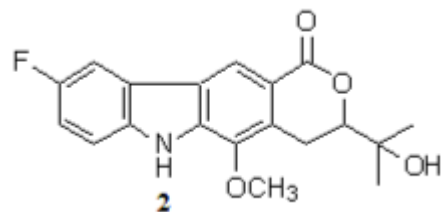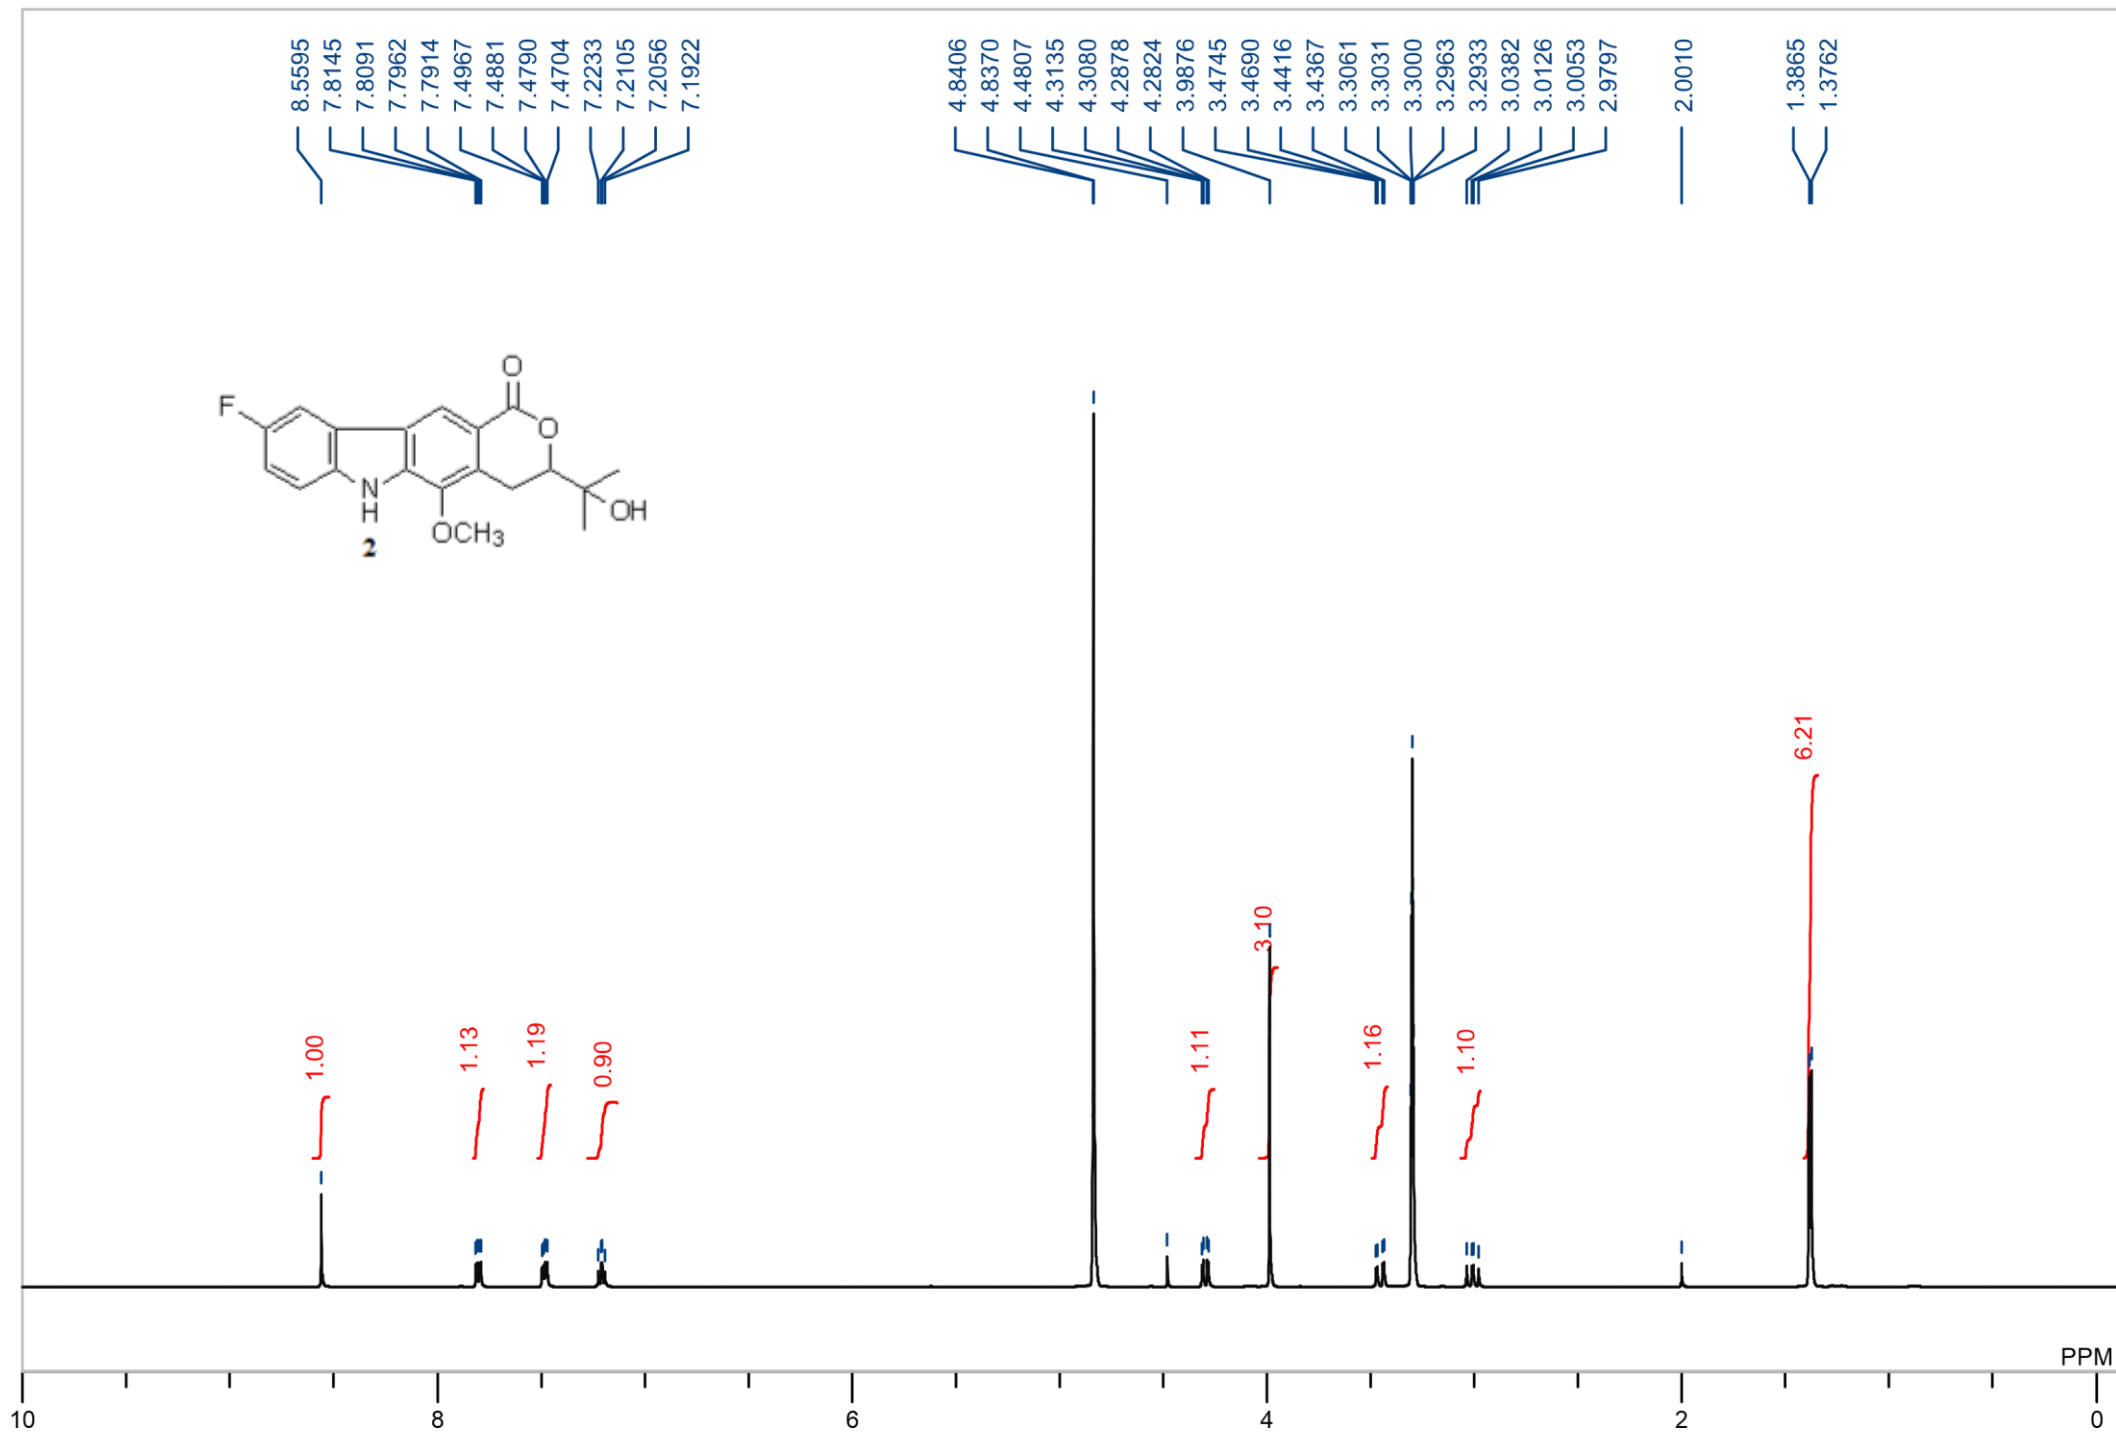

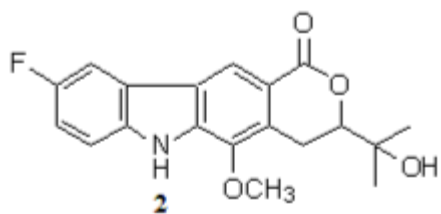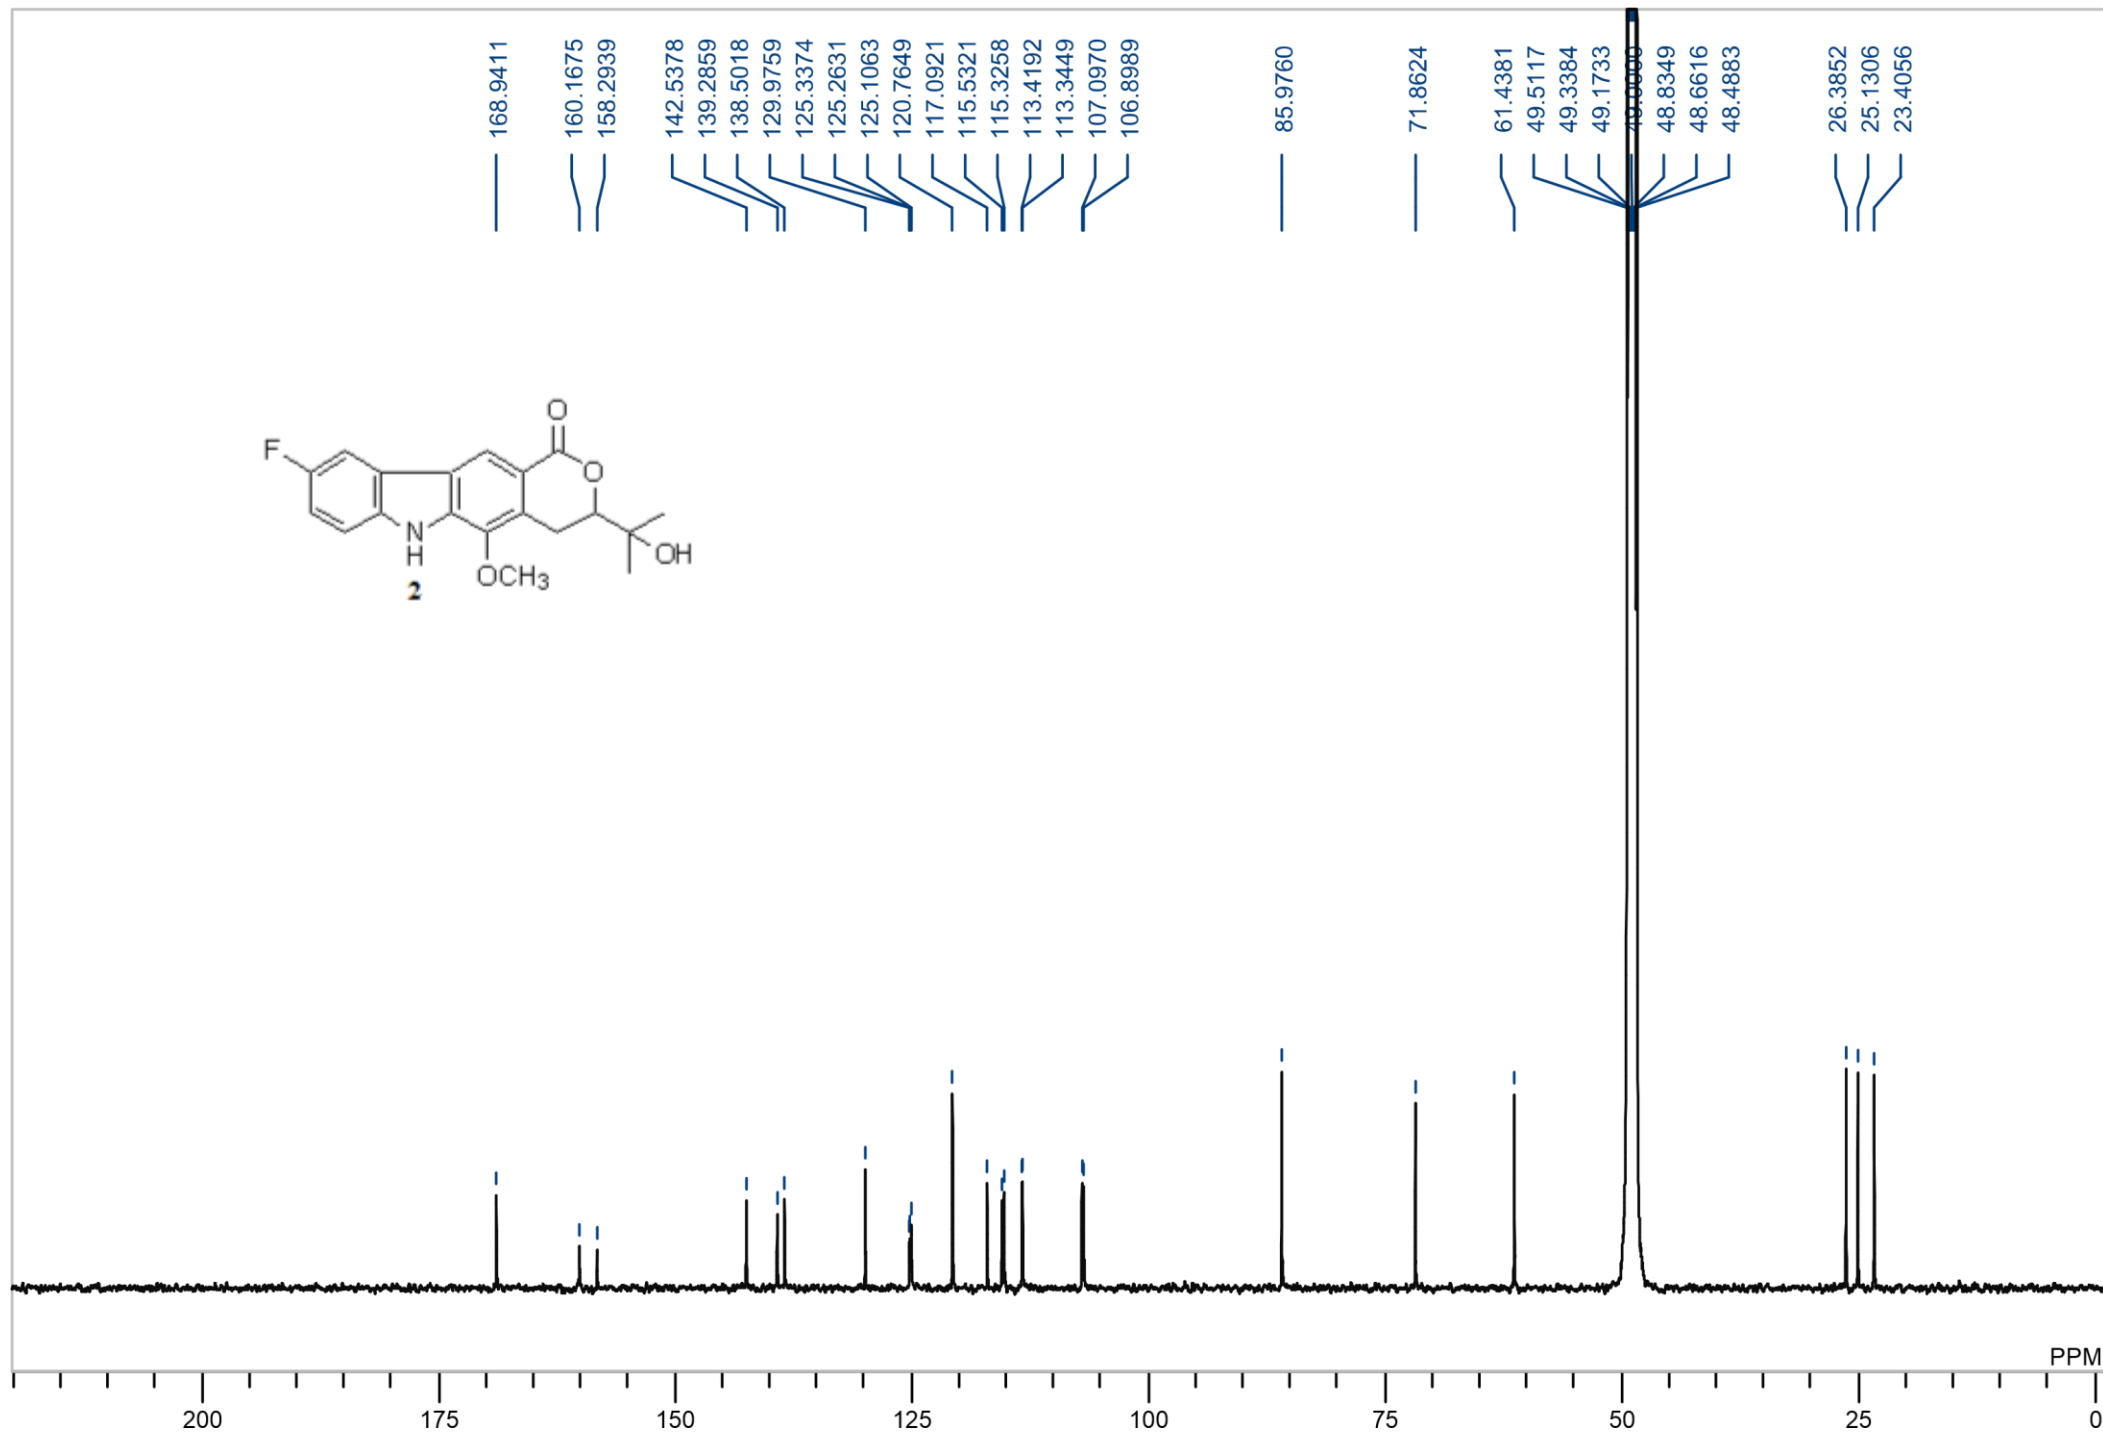

Supplement: c6ra03242g1.pdf [file c6ra03242g1.pdf]
